# Supplementary material for: Historical Redlining Is Associated with Disparities in Environmental Quality across California
Source: PubMed Central journal article supplement (PMC10867848; doi:10.1021/acs.estlett.3c00870), 2024-01-19
Supplement: ez3c00870_si_001.pdf [file ez3c00870_si_001.pdf]

1 **Supporting Information**

2

3 Historical redlining is associated with disparities in environmental quality across California

4

5 Cesar O. Estien\*<sup>1</sup>, Christine E. Wilkinson<sup>1,2</sup>, Rachel Morello-Frosch<sup>1,3</sup>, and Christopher J.  
6 Schell<sup>1</sup>

7

8 **Affiliations:**

9 <sup>1</sup>Department of Environmental Science, Policy, and Management, 130 Mulford Hall, University  
10 of California–Berkeley, Berkeley, CA 94720, USA

11 <sup>2</sup>California Academy of Sciences, 55 Music Concourse Drive, San Francisco, CA 94118, USA

12 <sup>3</sup>School of Public Health, 2121 Berkeley Way, University of California–Berkeley, Berkeley, CA  
13 94720, USA

14

15 \*Corresponding author: Cesar O. Estien, [cestien@berkeley.edu](mailto:cestien@berkeley.edu)

16

17 **Contents:**

18 Pages S1-S37

19 Table S1-S4

20 Figures S1-S24

21 **S1: Material and Methods**

22 S1.1: Study region

23 Our study takes place throughout California. We focused on California because of  
24 accessibility to the high-resolution environmental hazard mapping tool CalEnviroScreen 4.0<sup>1</sup>.  
25 Within California, eight cities have digitized Home Owner’s Loan Corporation (HOLC) maps via  
26 the University of Richmond’s Mapping Inequality project<sup>2</sup>: Fresno, Los Angeles, Oakland,  
27 Sacramento, San Diego, San Francisco, San Jose, and Stockton. Note, the Oakland HOLC map  
28 includes Oakland, Berkeley, San Leandro, Piedmont, Emeryville, and Albany, and the Los  
29 Angeles map includes the greater Los Angeles area<sup>2</sup>.

30 S1.2: Datasets and Geospatial Processing

31 CalEnviroScreen uses an array of measures (e.g., groundwater threats) and air quality (e.g.,  
32 ozone) to produce a cumulative pollution burden percentile for each census tract<sup>1</sup>. We followed  
33 CalEnviroScreen methodology to produce our own pollution burden for a neighborhood based on  
34 the hazards we downloaded. We first converted each environmental hazard into a raster before  
35 extracting the mean for an environmental hazard per HOLC neighborhood. We extracted  
36 children’s lead risk from housing, particulate matter 2.5 (PM<sub>2.5</sub>), diesel particulate matter, toxic  
37 releases from facilities, groundwater threats, which is based on the activates that can pose a threat  
38 to groundwater quality (e.g., land disposal sites, underground storage tanks, and animal farms),  
39 hazardous waste generators and facilities, which represents sites permitted to treat, store, or  
40 dispose of hazardous waste, and cleanup sites (i.e., brownfield sites). Read more about how  
41 CalEnviroScreen derives each hazardous metric at <https://oehha.ca.gov/calenviroscreen>.

42 To create a pollution burden for each neighborhood, we averaged what CalEnviroScreen  
43 considers an exposure (lead risk, PM<sub>2.5</sub>, diesel PM, toxic releases from facilities) and an  
44 environmental effect (groundwater threats, hazardous waste generators and facilities, cleanup  
45 sites) into an “exposure” and “effect” variable. We then combine the exposure and effect variables,  
46 with the effect score only weighed half as much as the exposure<sup>1</sup> (see Eq. 1-2). CalEnviroScreen  
47 does this as the contribution to the pollution burden a neighborhood experience comes less from  
48 hazards in the “effects” category and more from the “exposure” category. The “effects” category  
49 simply reflects the presence of these environmental hazards rather than direct exposure to them.  
50 After combining environmental hazards and averaging them (Eq. 3), we then binned them into  
51 percentiles such that pollution burden would be on a scale of 1 to 100, such that a score of 1  
52 represents no environmental hazard burden and a score of 100 represents the highest burden.

53 
$$EXPOSURE = \frac{LEAD + PM_{2.5} + DIESEL\ PM + TOXIC\ RELEASES}{4} \quad \text{Eq. 1}$$

54 
$$EFFECT = \frac{GROUNDWATER + HAZARD\ RELEASES + CLEANUP}{3} \quad \text{Eq. 2}$$

55 
$$Pollution\ Burden = \frac{(EXPOSURE + (EFFECT * 0.5))}{(1 + 0.5)} \quad \text{Eq. 3}$$

56 For Landsat 8 satellite imagery, we selected the year 2020 and 2021 to best align with the  
57 most recent data layers of CalEnviroScreen (see paragraph below), and we selected December and

58 January because we wanted to understand disparities in vegetation during the wetter part of the  
 59 year (i.e., highest vegetation). We downloaded Bands 4 and 5 to calculate Normalized  
 60 Differentiated Vegetation Index (NDVI) (see Equation 4) and Band 10 to calculate land surface  
 61 temperature (Equations 5-6).

$$62 \quad NDVI = \frac{NIR - Red}{NIR + Red} \quad \text{Eq. 4}$$

63  $NIR = \text{Near Infrared Band}$

64 To calculate land surface temperature, we first calculated the top of atmospheric (TOA)  
 65 spectral radiance using the following equation from:

$$66 \quad TOA = M_L * Q_{cal} + A_L \quad \text{Eq. 5}$$

67  $M_L = \text{Band} - \text{specific multiplicative rescaling factor}$

68  $Q_{cal} = \text{Band}$

69  $A_L = \text{Band} - \text{specific additive rescaling factor}$

70 After calculating the TOA, we then converted the values into Celsius to obtain land-surface  
 71 temperature with the following equation:

$$72 \quad T = \left( \frac{K_1}{\left( \ln \left( \frac{K_2}{L} \right) + 1 \right)} \right) - 273.15 \quad \text{Eq. 6}$$

73  $K_1 = \text{Band} - \text{specific thermal conversion constant from the metadata}$

$K_2 = \text{Band} - \text{specific thermal conversion constant from the metadata}$

74 To calculate noise pollution, we extracted data from HowLoud.com, which scales noise  
 75 pollution from 50, representing high levels of noise, and 100, representing high levels of silence.  
 76 For each city, we extracted values for 2,000 random points within that city's HOLC map. After  
 77 obtaining these values, we rasterized each point dataset using the 'Kriging' function. In short, the  
 78 kriging function interpolates data to infer values for particular spaces between points where  
 79 sampling did not occur<sup>3</sup>. After extracting data from HowLoud, we inverted the scale for  
 80 visualization purposes but retained the original values for use in our models (see S1.3)

### 81 S1.3: Data Analysis

82 To understand the influence of HOLC grade on the spatial distribution of environmental  
 83 hazards, we ran generalized linear mixed models (GLMMs) with HOLC grade as the fixed effect,  
 84 the area of a neighborhood as a log-offset variable, and city as a random effect using the *glmmTMB*  
 85 package<sup>4</sup>. We repeated this model approach at the city-level, but removed city as a random effect  
 86 and used a general linear model with the *betareg*<sup>5</sup>. For all environmental hazards except NDVI,  
 87 temperature, and noise we used a beta distribution given the data were bounded between 0 and 1.  
 88 For NDVI, temperature, and noise, we used a log-linked gaussian distribution. We built two  
 89 models for environmental hazards: a model containing HOLC grade as an independent variable  
 90 and a null model where HOLC grade was omitted.

91 *HOLC Model: Environmental Hazard ~ HOLC Grade + offset (Neighborhood Area)*  
*+ (1 | city)*

92 *Null Model: Environmental Hazard ~ 1 + offset (Neighborhood Area) + (1 | city)*

93 We then used an AICc model-selection approach, selecting the models with the lowest  
94 AICc value. When the top-performing model was identified, we tested for significant differences  
95 between the top-performing model and the null model using likelihood ratio tests (LRT). If the  
96 differences were significant, we extracted the estimated marginal means and performed Tukey-  
97 Kramer's post-hoc analyses to determine which specific HOLC grade dyads (e.g., A vs. C, A vs.  
98 D, etc.) differed in the focal environmental hazard(s). Model selection results are found in  
99 Supporting Information 2.

100 **References**

- 101 1. California Office of Environmental Health Hazard Assessment. CalEnviroScreen 4.0.  
102 <https://oehha.ca.gov/calenviroscreen/report/draft-calenviroscreen-40> (accessed 2023-11-29).
- 103 2. Nelson, R. K., Winling, L., Marciano, R., Connolly, N. & Ayers, E. L. Mapping inequality:  
104 Redlining in new deal America. *American Panorama: An Atlas of United States History*.  
105 *University of Richmond: Digital Scholarship Lab* **17**, 19 (2020).
- 106 3. OLIVER, M. A. & WEBSTER, R. Kriging: a method of interpolation for geographical  
107 information systems. *International journal of geographical information systems* **4**, 313–332  
108 (1990).
- 109 4. Magnusson, A. *et al.* Package ‘glmmtmb’. *R Package Version 0.2. 0* **25**, (2017).
- 110 5. Zeileis, A. *et al.* Package ‘betareg’. *R package* **3**, (2016).

## 112 S2: Supporting Information Results

### 113 S2.1: Model Results

114 We found a strong relationship between HOLC grade and environmental quality (Figure  
115 1; Table 1; SM 2). We found a significant effect of HOLC grade on a neighborhoods pollution  
116 burden (Likelihood Ratio Test (LRT) = 71.3;  $p < 0.0001$ ), particulate matter 2.5 (hereafter  $PM_{2.5}$ )  
117 (LRT = 9.1;  $p < 0.05$ ) diesel pm (hereafter diesel PM) (LRT = 54.5;  $p < 0.0001$ ), lead risk (LRT  
118 = 23.7;  $p < 0.0001$ ), groundwater threat (LRT = 15.9;  $p < 0.01$ ), toxic releases by facilities (LRT  
119 = 18.3;  $p = 0.0004$ ), hazardous waste facilities (LRT = 17.7;  $p = 0.0005$ ), cleanup sites (LRT =  
120 37.7;  $p < 0.0001$ ), amount of vegetation (LRT = 101.1;  $p < 0.0001$ ), temperature (LRT = 101.1;  $p$   
121  $< 0.0001$ ), and noise (LRT = 85.57;  $p < 0.0001$ ). We found variation for the effect of HOLC  
122 grade on environmental hazards at the city-level (Table S2; Figures S2-10).

### 123 S2.2: Intraurban Disparities

124 We found significant differences in intraurban disparities between HOLC grades across  
125 the environmental hazards examined. For pollution burden, grade D held the highest disparity  
126 ( $17.4 \pm 20.9$ ; Table S3), followed by grades C, B, and A and we found significant differences  
127 between all pairwise comparisons (Table S4). For lead, grade D held the highest disparity ( $5.4 \pm$   
128  $28.4$ ; Table S3), followed by grades C, B, and A. We found significant differences between all  
129 pairwise comparisons except B and C and C and D (Table S4). For groundwater threat, grade D  
130 held the highest disparity ( $9.5 \pm 24.0$ ; Table S3), followed by grades C, B, and A. We found  
131 significant differences between grades A and B as well as A and D (Table S4). For toxic  
132 releases, grade D held the highest disparity ( $3.7 \pm 13.8$ ; Table S3), followed by grades C, B, and  
133 A and we found significant differences between all grades except A and B as well as B and C  
134 (Table S4). For hazardous waste facilities, grade D held the highest disparity ( $11.3 \pm 29.8$ ; Table  
135 S3), followed by grades C, B, and A and we found significant differences between all grades  
136 except A and B as well as B and C (Table S4). For cleanup sites, grade D held the highest  
137 disparity ( $13.0 \pm 28.6$ ; Table S3), followed by grades C, B, and A and we found significant  
138 differences between all grades except A and B as well as B and C (Table S4). For diesel PM,  
139 grade D held the highest disparity ( $18.4 \pm 23.8$ ; Table S3), followed by grades C, B, and A, with  
140 all pair-wise comparisons showing significant differences (Table S4). For  $PM_{2.5}$ , grade D held  
141 the highest disparity ( $4.2 \pm 12.3$ ; Table S3), followed by grades C, B, and A, with all pair-wise  
142 comparisons showing significant differences (Table S4). For NDVI, grade D had the lowest  
143 disparity ( $-0.02 \pm 0.02$ ; Table S3), followed by grades C, B, and A. We found significant  
144 differences between all pairwise comparisons for NDVI (Table S4). For temperature, grade D  
145 had the highest disparity ( $0.4 \pm 0.8$ ; Table S3), followed by grades C, B, and A. We found  
146 significant differences in thermal intensity between all pairwise comparisons except grades C  
147 and D (Table S4). Lastly, for noise pollution, grade D had the highest disparity ( $1.7 \pm 3.2$ ; Table  
148 S3), followed by grades C, B, and A. We found significant differences between all pairwise  
149 comparisons for noise pollution (Table S4).

150 **S3: Supporting Information Tables**

| <b>Environmental Hazard</b>  | <b>A-B</b>           | <b>A-C</b>           | <b>A-D</b>           | <b>B-C</b>           | <b>B-D</b>           | <b>C-D</b>           |
|------------------------------|----------------------|----------------------|----------------------|----------------------|----------------------|----------------------|
| *PM <sub>2.5</sub>           | p = 0.1069           | p = 0.9765           | p = 0.6867           | <b>p &lt; 0.05</b>   | p = 0.6105           | p = 0.7534           |
| Diesel PM                    | <b>p &lt; 0.0001</b> | <b>p &lt; 0.0001</b> | <b>p &lt; 0.0001</b> | p = 1                | <b>p &lt; 0.001</b>  | <b>p &lt; 0.01</b>   |
| Lead Risk                    | <b>p = 0.0001</b>    | p = 0.1646           | p = 0.4856           | <b>p &lt; 0.01</b>   | <b>p &lt; 0.05</b>   | p = 0.9681           |
| Groundwater threat           | <b>p &lt; 0.01</b>   | p = 0.1597           | <b>p &lt; 0.01</b>   | p = 0.3309           | p = 0.7998           | p = 0.0936           |
| Toxic Releases by Facilities | <b>p &lt; 0.05</b>   | p = 0.9905           | p = 0.7855           | <b>p &lt; 0.001</b>  | p = 0.0813           | 0.8140               |
| Hazardous Waste Facilities   | <b>p &lt; 0.05</b>   | p = 0.3537           | <b>p &lt; 0.001</b>  | p = 0.2913           | p = 0.4328           | <b>p &lt; 0.05</b>   |
| Cleanup Sites                | <b>p &lt; 0.05</b>   | p = 0.3493           | <b>p &lt; 0.0001</b> | p = 0.1795           | <b>p &lt; 0.01</b>   | <b>p &lt; 0.0001</b> |
| Pollution Burden             | <b>p &lt; 0.0001</b> | <b>p &lt; 0.0001</b> | <b>p &lt; 0.0001</b> | p = 0.9999           | <b>p = 0.0001</b>    | <b>p &lt; 0.0001</b> |
| NDVI                         | <b>p &lt; 0.001</b>  | <b>p &lt; 0.0001</b> | <b>p &lt; 0.0001</b> | <b>p &lt; 0.0001</b> | <b>p &lt; 0.0001</b> | <b>p &lt; 0.001</b>  |
| Heat                         | <b>p &lt; 0.0001</b> | p = 0.9898           | <b>p &lt; 0.01</b>   | <b>p &lt; 0.0001</b> | <b>p &lt; 0.0001</b> | <b>p &lt; 0.001</b>  |
| Noise Pollution              | <b>p &lt; 0.0001</b> | p = 0.9882           | <b>p &lt; 0.01</b>   | <b>p &lt; 0.0001</b> | <b>p &lt; 0.0001</b> | <b>p &lt; 0.01</b>   |

151 **Table S1.** Pair-wise comparisons for environmental hazards across California from generalized  
152 linear mixed-models after controlling for the area of a neighborhood and among-city variation.  
153 We used Tukey-Kramer’s post-hoc analyses to determine which specific HOLC grade dyads  
154 (e.g., A vs. C, A vs. D, etc.) significantly differed in the focal environmental hazard(s).  
155 Significant comparisons are bolded. \*PM<sub>2.5</sub> = particulate matter 2.5

| City        | Environmental Hazard         | A-B                  | A-C                  | A-D                  | B-C                  | B-D                  | C-D                  |
|-------------|------------------------------|----------------------|----------------------|----------------------|----------------------|----------------------|----------------------|
| Fresno      | *PM <sub>2.5</sub>           |                      |                      |                      |                      |                      |                      |
| Fresno      | Diesel PM                    | p = 0.9996           | p = 0.3360           | p = 0.2404           | <b>p = 0.05</b>      | <b>p &lt; 0.05</b>   | p = 0.9175           |
| Fresno      | Lead Risk                    | p = 0.3380           | p = 0.5474           | p = 0.9495           | p = 0.3259           | <b>p &lt; 0.01</b>   | p = 0.0608           |
| Fresno      | Groundwater threat           |                      |                      |                      |                      |                      |                      |
| Fresno      | Toxic Releases by Facilities |                      |                      |                      |                      |                      |                      |
| Fresno      | Hazardous Waste Facilities   |                      |                      |                      |                      |                      |                      |
| Fresno      | Cleanup Sites                |                      |                      |                      |                      |                      |                      |
| Fresno      | Pollution Burden             |                      |                      |                      |                      |                      |                      |
| Fresno      | NDVI                         | p = 0.0763           | <b>p &lt; 0.001</b>  | <b>p &lt; 0.05</b>   | p = 0.0610           | p = 0.9534           | p = 0.1694           |
| Fresno      | Temperature (°C)             | p = 0.3156           | <b>p &lt; 0.05</b>   | p = 0.2698           | p = 0.1359           | p = 1                | p = 0.0702           |
| Fresno      | Noise Pollution              | p = 0.2125           | <b>p &lt; 0.01</b>   | p = 0.1470           | p = 0.1104           | p = 0.9990           | p = 0.0943           |
| Los Angeles | PM <sub>2.5</sub>            | <b>p = 0.0005</b>    | <b>p &lt; 0.0001</b> | <b>p &lt; 0.0001</b> | <b>p &lt; 0.001</b>  | <b>p &lt; 0.0001</b> | <b>p &lt; 0.001</b>  |
| Los Angeles | Diesel PM                    | <b>p &lt; 0.0001</b> | <b>p &lt; 0.0001</b> | <b>p &lt; 0.0001</b> | <b>p = 0.0001</b>    | <b>p &lt; 0.0001</b> | <b>p &lt; 0.0001</b> |
| Los Angeles | Lead Risk                    | <b>p &lt; 0.01</b>   | <b>p &lt; 0.0001</b> | <b>p &lt; 0.0001</b> | <b>p &lt; 0.01</b>   | <b>p &lt; 0.0001</b> | p = 0.1679           |
| Los Angeles | Groundwater threat           | <b>p = 0.0001</b>    | <b>p &lt; 0.0001</b> | <b>p &lt; 0.0001</b> | p = 0.7363           | <b>p &lt; 0.001</b>  | <b>p &lt; 0.01</b>   |
| Los Angeles | Toxic Releases by Facilities | p = 0.7866           | <b>p = 0.0001</b>    | <b>p &lt; 0.0001</b> | <b>p = 0.0002</b>    | <b>p &lt; 0.0001</b> | <b>p &lt; 0.0001</b> |
| Los Angeles | Hazardous Waste Facilities   | <b>p &lt; 0.01</b>   | <b>p &lt; 0.0001</b> | <b>p &lt; 0.0001</b> | p = 0.4175           | <b>p &lt; 0.0001</b> | <b>p &lt; 0.0001</b> |
| Los Angeles | Cleanup Sites                | p = 0.1135           | <b>p = 0.0003</b>    | <b>p &lt; 0.0001</b> | p = 0.2266           | <b>p &lt; 0.0001</b> | <b>p = 0.0004</b>    |
| Los Angeles | Pollution Burden             | <b>p &lt; 0.0001</b> | <b>p &lt; 0.0001</b> | <b>p &lt; 0.0001</b> | <b>p &lt; 0.0001</b> | <b>p &lt; 0.0001</b> | <b>p &lt; 0.0001</b> |
| Los Angeles | NDVI                         | <b>p &lt; 0.01</b>   | <b>p &lt; 0.0001</b> | <b>p &lt; 0.0001</b> | <b>p &lt; 0.0001</b> | <b>p &lt; 0.0001</b> | p = 0.2785           |
| Los Angeles | Temperature (°C)             | <b>p &lt; 0.0001</b> | p = 0.9766           | p = 0.4686           | <b>p &lt; 0.0001</b> | <b>p &lt; 0.0001</b> | p = 0.4631           |
| Los Angeles | Noise Pollution              | <b>p &lt; 0.0001</b> | p = 0.5903           | p = 0.0871           | <b>p &lt; 0.0001</b> | <b>p &lt; 0.0001</b> | p = 0.3737           |
| Oakland     | PM <sub>2.5</sub>            |                      |                      |                      |                      |                      |                      |
| Oakland     | Diesel PM                    | <b>p &lt; 0.01</b>   | <b>p &lt; 0.0001</b> | <b>p &lt; 0.0001</b> | p = 0.1127           | <b>p &lt; 0.0001</b> | <b>p &lt; 0.0001</b> |
| Oakland     | Lead Risk                    | <b>p &lt; 0.01</b>   | <b>p &lt; 0.0001</b> | <b>p &lt; 0.0001</b> | p = 0.1687           | <b>p &lt; 0.01</b>   | p = 0.5187           |
| Oakland     | Groundwater threat           | <b>p &lt; 0.001</b>  | <b>p &lt; 0.0001</b> | <b>p &lt; 0.0001</b> | <b>p &lt; 0.0001</b> | <b>p &lt; 0.0001</b> | <b>p &lt; 0.0001</b> |



|               |                              |                     |                      |                      |                      |                      |                      |
|---------------|------------------------------|---------------------|----------------------|----------------------|----------------------|----------------------|----------------------|
| Oakland       | Toxic Releases by Facilities | p = 0.6413          | <b>p &lt; 0.05</b>   | p = 0.9767           | p = 0.1851           | p = 0.8014           | <b>p &lt; 0.05</b>   |
| Oakland       | Hazardous Waste Facilities   | p = 0.7717          | p = 0.8691           | <b>p &lt; 0.0001</b> | p = 0.9932           | <b>p &lt; 0.0001</b> | <b>p &lt; 0.0001</b> |
| Oakland       | Cleanup Sites                | p = 0.9996          | p = 0.8736           | <b>p &lt; 0.0001</b> | p = 0.7057           | <b>p &lt; 0.0001</b> | <b>p &lt; 0.0001</b> |
| Oakland       | Pollution Burden             | <b>p &lt; 0.001</b> | <b>p &lt; 0.0001</b> | <b>p &lt; 0.0001</b> | <b>p &lt; 0.05</b>   | <b>p &lt; 0.0001</b> | <b>p &lt; 0.0001</b> |
| Oakland       | NDVI                         | <b>p &lt; 0.001</b> | p = 0.7368           | p = 0.1089           | <b>p &lt; 0.01</b>   | <b>p &lt; 0.0001</b> | <b>p &lt; 0.05</b>   |
| Oakland       | Temperature (°C)             | <b>p &lt; 0.01</b>  | <b>p &lt; 0.05</b>   | p = 0.8893           | p = 0.2965           | <b>p = 0.0004</b>    | <b>p &lt; 0.05</b>   |
| Oakland       | Noise Pollution              | <b>p &lt; 0.01</b>  | p = 0.0772           | p = 1                | p = 0.0906           | <b>p &lt; 0.0001</b> | <b>p &lt; 0.05</b>   |
| Sacramento    | PM <sub>2.5</sub>            | p = 0.9781          | p = 0.9959           | p = 0.1721           | p = 0.7225           | p = 0.1286           | <b>p &lt; 0.05</b>   |
| Sacramento    | Diesel PM                    |                     |                      |                      |                      |                      |                      |
| Sacramento    | Lead Risk                    |                     |                      |                      |                      |                      |                      |
| Sacramento    | Groundwater threat           |                     |                      |                      |                      |                      |                      |
| Sacramento    | Toxic Releases by Facilities | p = 0.9679          | p = 0.9829           | <b>p &lt; 0.05</b>   | p = 0.5220           | <b>p &lt; 0.05</b>   | <b>p = 0.0001</b>    |
| Sacramento    | Hazardous Waste Facilities   |                     |                      |                      |                      |                      |                      |
| Sacramento    | Cleanup Sites                | p = 0.3607          | p = 0.1907           | p = 0.5458           | p = 0.9973           | <b>p = 0.0001</b>    | <b>p &lt; 0.0001</b> |
| Sacramento    | Pollution Burden             | p = 0.8047          | p = 0.9681           | <b>p &lt; 0.05</b>   | p = 0.8337           | <b>p &lt; 0.05</b>   | <b>p &lt; 0.001</b>  |
| Sacramento    | NDVI                         | p = 0.3663          | p = 0.9343           | p = 0.9988           | <b>p &lt; 0.001</b>  | p = 0.3015           | p = 0.7847           |
| Sacramento    | Temperature (°C)             | p = 0.3121          | p = 0.9992           | p = 0.8371           | <b>p &lt; 0.01</b>   | p = 0.5311           | p = 0.5523           |
| Sacramento    | Noise Pollution              | p = 0.3831          | p = 0.9998           | p = 0.8544           | <b>p &lt; 0.01</b>   | p = 0.6537           | p = 0.4194           |
| San Diego     | PM <sub>2.5</sub>            | <b>p &lt; 0.05</b>  | <b>p &lt; 0.05</b>   | <b>p &lt; 0.0001</b> | p = 1                | <b>p &lt; 0.0001</b> | <b>p &lt; 0.0001</b> |
| San Diego     | Diesel PM                    | p = 0.7281          | <b>p &lt; 0.05</b>   | p = 0.0596           | p = 0.2731           | p = 0.3719           | p = 0.9955           |
| San Diego     | Lead Risk                    | p = 0.9988          | p = 0.9665           | <b>p &lt; 0.0001</b> | p = 0.9838           | <b>p &lt; 0.0001</b> | <b>p &lt; 0.0001</b> |
| San Diego     | Groundwater threat           |                     |                      |                      |                      |                      |                      |
| San Diego     | Toxic Releases by Facilities | p = 0.3983          | p = 0.2369           | <b>p &lt; 0.0001</b> | p = 0.9922           | <b>p = 0.0001</b>    | <b>p &lt; 0.001</b>  |
| San Diego     | Hazardous Waste Facilities   |                     |                      |                      |                      |                      |                      |
| San Diego     | Cleanup Sites                | p = 0.9997          | p = 0.3023           | p = 0.9981           | p = 0.1900           | p = 0.9868           | <b>p &lt; 0.05</b>   |
| San Diego     | Pollution Burden             | p = 0.9992          | p = 0.9965           | p = 0.0775           | p = 0.9997           | <b>p &lt; 0.05</b>   | p = 0.0568           |
| San Diego     | NDVI                         | <b>p &lt; 0.05</b>  | <b>p &lt; 0.0001</b> | <b>p &lt; 0.0001</b> | <b>p &lt; 0.05</b>   | <b>p &lt; 0.0001</b> | <b>p &lt; 0.01</b>   |
| San Diego     | Temperature (°C)             | p = 0.6361          | <b>p &lt; 0.05</b>   | <b>p &lt; 0.0001</b> | p = 0.1469           | <b>p &lt; 0.0001</b> | <b>p &lt; 0.001</b>  |
| San Diego     | Noise Pollution              | p = 0.4258          | <b>p &lt; 0.01</b>   | <b>p &lt; 0.0001</b> | p = 0.0872           | <b>p &lt; 0.0001</b> | <b>p &lt; 0.001</b>  |
| San Francisco | PM <sub>2.5</sub>            |                     |                      |                      |                      |                      |                      |
| San Francisco | Diesel PM                    | p = 0.8836          | <b>p &lt; 0.01</b>   | <b>p &lt; 0.0001</b> | <b>p &lt; 0.0001</b> | <b>p &lt; 0.0001</b> | <b>p &lt; 0.0001</b> |

|               |                              |                      |                      |                      |                    |                      |                      |
|---------------|------------------------------|----------------------|----------------------|----------------------|--------------------|----------------------|----------------------|
| San Francisco | Lead Risk                    |                      |                      |                      |                    |                      |                      |
| San Francisco | Groundwater threat           | p = 0.5771           | p = 0.8981           | <b>p &lt; 0.0001</b> | <b>p &lt; 0.05</b> | <b>p &lt; 0.0001</b> | <b>p &lt; 0.0001</b> |
| San Francisco | Toxic Releases by Facilities |                      |                      |                      |                    |                      |                      |
| San Francisco | Hazardous Waste Facilities   | p = 0.5975           | p = 0.8859           | p = 0.0986           | p = 0.8663         | <b>p &lt; 0.0001</b> | <b>p &lt; 0.0001</b> |
| San Francisco | Cleanup Sites                |                      |                      |                      |                    |                      |                      |
| San Francisco | Pollution Burden             | p = 0.9957           | p = 0.9923           | <b>p &lt; 0.0001</b> | p = 0.8725         | <b>p &lt; 0.0001</b> | <b>p &lt; 0.0001</b> |
| San Francisco | NDVI                         | <b>p &lt; 0.0001</b> | <b>p &lt; 0.0001</b> | <b>p &lt; 0.0001</b> | p = 0.8954         | p = 0.8396           | p = 0.4520           |
| San Francisco | Temperature (°C)             | <b>p &lt; 0.001</b>  | <b>p &lt; 0.01</b>   | <b>p = 0.0001</b>    | p = 0.5308         | p = 0.9921           | p = 0.3487           |
| San Francisco | Noise Pollution              | <b>p = 0.0001</b>    | <b>p &lt; 0.01</b>   | <b>p &lt; 0.0001</b> | p = 0.6643         | p = 0.8907           | p = 0.2668           |
| San Jose      | PM <sub>2.5</sub>            |                      |                      |                      |                    |                      |                      |
| San Jose      | Diesel PM                    | p = 0.4617           | p = 0.9985           | p = 0.9086           | p = 0.0682         | <b>p &lt; 0.001</b>  | p = 0.2357           |
| San Jose      | Lead Risk                    |                      |                      |                      |                    |                      |                      |
| San Jose      | Groundwater threat           |                      |                      |                      |                    |                      |                      |
| San Jose      | Toxic Releases by Facilities |                      |                      |                      |                    |                      |                      |
| San Jose      | Hazardous Waste Facilities   |                      |                      |                      |                    |                      |                      |
| San Jose      | Cleanup Sites                |                      |                      |                      |                    |                      |                      |
| San Jose      | Pollution Burden             | p = 0.5345           | p = 1                | p = 0.9557           | <b>p &lt; 0.05</b> | <b>p &lt; 0.01</b>   | p = 0.6152           |
| San Jose      | NDVI                         |                      |                      |                      |                    |                      |                      |
| San Jose      | Temperature (°C)             | p = 0.8947           | p = 0.9956           | p = 0.6401           | p = 0.3713         | p = 0.9032           | <b>p &lt; 0.05</b>   |
| San Jose      | Noise Pollution              | p = 0.8781           | p = 0.9981           | p = 0.5144           | p = 0.3874         | p = 0.7902           | <b>p &lt; 0.05</b>   |
| Stockton      | PM <sub>2.5</sub>            | p = 0.9651           | p = 0.5506           | <b>p &lt; 0.05</b>   | p = 0.6140         | <b>p &lt; 0.01</b>   | p = 0.1055           |
| Stockton      | Diesel PM                    | p = 0.9265           | p = 0.5164           | <b>p &lt; 0.05</b>   | p = 0.6869         | <b>p &lt; 0.01</b>   | p = 0.2084           |
| Stockton      | Lead Risk                    |                      |                      |                      |                    |                      |                      |
| Stockton      | Groundwater threat           | p = 0.6739           | p = 0.9463           | p = 0.9357           | p = 0.0624         | <b>p &lt; 0.05</b>   | p = 1                |
| Stockton      | Toxic Releases by Facilities |                      |                      |                      |                    |                      |                      |
| Stockton      | Hazardous Waste Facilities   |                      |                      |                      |                    |                      |                      |
| Stockton      | Cleanup Sites                | p = 0.6393           | <b>p &lt; 0.05</b>   | <b>p &lt; 0.01</b>   | p = 0.0533         | <b>p &lt; 0.05</b>   | p = 1                |
| Stockton      | Pollution Burden             | p = 0.6889           | <b>p &lt; 0.05</b>   | <b>p &lt; 0.001</b>  | <b>p &lt; 0.05</b> | <b>p = 0.0001</b>    | p = 0.3316           |

|          |                  |            |                    |                    |            |                    |       |
|----------|------------------|------------|--------------------|--------------------|------------|--------------------|-------|
| Stockton | NDVI             | p = 0.9774 | <b>p &lt; 0.05</b> | <b>p &lt; 0.01</b> | p = 0.0533 | <b>p &lt; 0.05</b> | p = 1 |
| Stockton | Temperature (°C) |            |                    |                    |            |                    |       |
| Stockton | Noise Pollution  |            |                    |                    |            |                    |       |

156 **Table S2.** Pair-wise comparisons for environmental hazards in Californian cities from  
157 generalized linear models that control for the area of a neighborhood. Environmental hazards that  
158 showed significance was followed by a Tukey-Kramer’s post-hoc analyses to determine which  
159 specific HOLC grade dyads (e.g., A vs. C, A vs. D, etc.) significantly differed in the focal  
160 environmental hazard(s). Significant comparisons for Tukey-Kramer’s post-hoc analyses are  
161 bolded. Grey rows indicate no significant differences were found between HOLC grades. \*PM<sub>2.5</sub>  
162 = particulate matter 2.5

| <b>Environmental Hazard</b>  | <b>Grade A<br/>(n = 109)</b> | <b>Grade B<br/>(n = 273)</b> | <b>Grade C<br/>(n = 331)</b> | <b>Grade D<br/>(n = 155)</b> |
|------------------------------|------------------------------|------------------------------|------------------------------|------------------------------|
| PM <sub>2.5</sub>            | -5.2 (10.7)                  | -1.8 (10.9)                  | 1.2 (11.7)                   | 4.2 (12.3)                   |
| Diesel PM                    | -18.5 (22.7)                 | -7.9 (25.9)                  | 4.0 (26.5)                   | 18.4 (23.8)                  |
| Lead Risk                    | -10.7 (21.0)                 | -2.0 (23.4)                  | 2.6 (26.7)                   | 5.4 (28.4)                   |
| Groundwater threat           | -10.5 (22.0)                 | -3.7 (21.9)                  | 2.1 (22.6)                   | 9.5 (24.0)                   |
| Toxic Releases by Facilities | -4.4 (11.5)                  | -0.9 (11.5)                  | 0.4 (12.1)                   | 3.7 (13.8)                   |
| Hazardous Waste Facilities   | -2.1 (22.1)                  | -4.6 (26.9)                  | 2.5 (27.1)                   | 11.3 (29.8)                  |
| Cleanup Sites                | -8.6 (26.0)                  | -4.8 (26.2)                  | 0.7 (25.2)                   | 13.0 (28.6)                  |
| Pollution Burden             | -19.0 (21.2)                 | -7.3 (20.8)                  | 4.1 (22.7)                   | 17.4 (20.9)                  |
| NDVI                         | 0.04 (0.03)                  | 0.01 (0.03)                  | -0.01 (0.02)                 | -0.02 (0.02)                 |
| Temperature (°C)             | -0.8 (1.0)                   | -0.2 (0.9)                   | 0.2 (0.7)                    | 0.4 (0.8)                    |
| Noise Pollution              | -2.4 (3.3)                   | -0.6 (3.2)                   | 0.5 (3.1)                    | 1.7 (3.2)                    |

164 **Table S3.** Intraurban disparity data for each environmental hazard shown is as mean (standard  
165 deviation) across HOLC grades (grades A = “best” and “greenlined”, B, C, and D = “hazardous”  
166 and “redlined”). The number of graded neighborhoods for each HOLC grade is shown above the  
167 respective column. \*PM<sub>2.5</sub> = particulate matter 2.5

| <b>Environmental Hazard</b>  | <b>A-B</b>           | <b>A-C</b>           | <b>A-D</b>           | <b>B-C</b>           | <b>B-D</b>           | <b>C-D</b>           |
|------------------------------|----------------------|----------------------|----------------------|----------------------|----------------------|----------------------|
| PM <sub>2.5</sub>            | <b>p &lt; 0.05</b>   | <b>p &lt; 0.0001</b> | <b>p &lt; 0.0001</b> | <b>p &lt; 0.01</b>   | <b>p &lt; 0.0001</b> | <b>p &lt; 0.05</b>   |
| Diesel PM                    | <b>p &lt; 0.01</b>   | <b>p &lt; 0.0001</b> | <b>p &lt; 0.0001</b> | <b>p &lt; 0.0001</b> | <b>p &lt; 0.0001</b> | <b>p &lt; 0.0001</b> |
| Lead Risk                    | <b>p &lt; 0.05</b>   | <b>p &lt; 0.0001</b> | <b>p &lt; 0.0001</b> | p = 0.1230           | <b>p &lt; 0.05</b>   | p = 0.6661           |
| Groundwater threat           | <b>p &lt; 0.05</b>   | <b>p &lt; 0.0001</b> | <b>p &lt; 0.0001</b> | <b>p &lt; 0.05</b>   | <b>p &lt; 0.0001</b> | <b>p &lt; 0.01</b>   |
| Toxic Releases by Facilities | p = 0.0561           | <b>p &lt; 0.01</b>   | <b>p &lt; 0.0001</b> | p = 0.554            | <b>p &lt; 0.01</b>   | <b>p &lt; 0.05</b>   |
| Hazardous Waste Facilities   | p = 0.0676           | <b>p &lt; 0.0001</b> | <b>p &lt; 0.0001</b> | <b>p &lt; 0.01</b>   | <b>p &lt; 0.0001</b> | <b>p &lt; 0.01</b>   |
| Cleanup Sites                | p = 0.5801           | <b>p &lt; 0.01</b>   | <b>p &lt; 0.0001</b> | p = 0.0504           | <b>p &lt; 0.0001</b> | <b>p &lt; 0.0001</b> |
| Pollution Burden             | <b>p &lt; 0.0001</b> | <b>p &lt; 0.0001</b> | <b>p &lt; 0.0001</b> | <b>p &lt; 0.0001</b> | <b>p &lt; 0.0001</b> | <b>p &lt; 0.0001</b> |
| NDVI                         | <b>p &lt; 0.0001</b> | <b>p &lt; 0.0001</b> | <b>p &lt; 0.0001</b> | <b>p &lt; 0.0001</b> | <b>p &lt; 0.0001</b> | <b>p &lt; 0.01</b>   |
| Temperature (°C)             | <b>p &lt; 0.0001</b> | <b>p &lt; 0.0001</b> | <b>p &lt; 0.0001</b> | <b>p &lt; 0.0001</b> | <b>p &lt; 0.0001</b> | p = 0.40             |
| Noise Pollution              | <b>p &lt; 0.0001</b> | <b>p &lt; 0.0001</b> | <b>p &lt; 0.0001</b> | <b>p &lt; 0.0001</b> | <b>p &lt; 0.0001</b> | <b>p &lt; 0.001</b>  |

168 **Table S4.** Pair-wise comparisons for environmental hazards across California for intraurban  
169 disparity data via ANOVA. We used Tukey-Kramer's post-hoc analyses to determine which  
170 specific HOLC grade dyads (e.g., A vs. C, A vs. D, etc.) significantly differed in the focal  
171 environmental hazard(s). Significant comparisons are bolded. \*PM<sub>2.5</sub> = particulate matter 2.5

172 **S4: Supporting Information Figures**

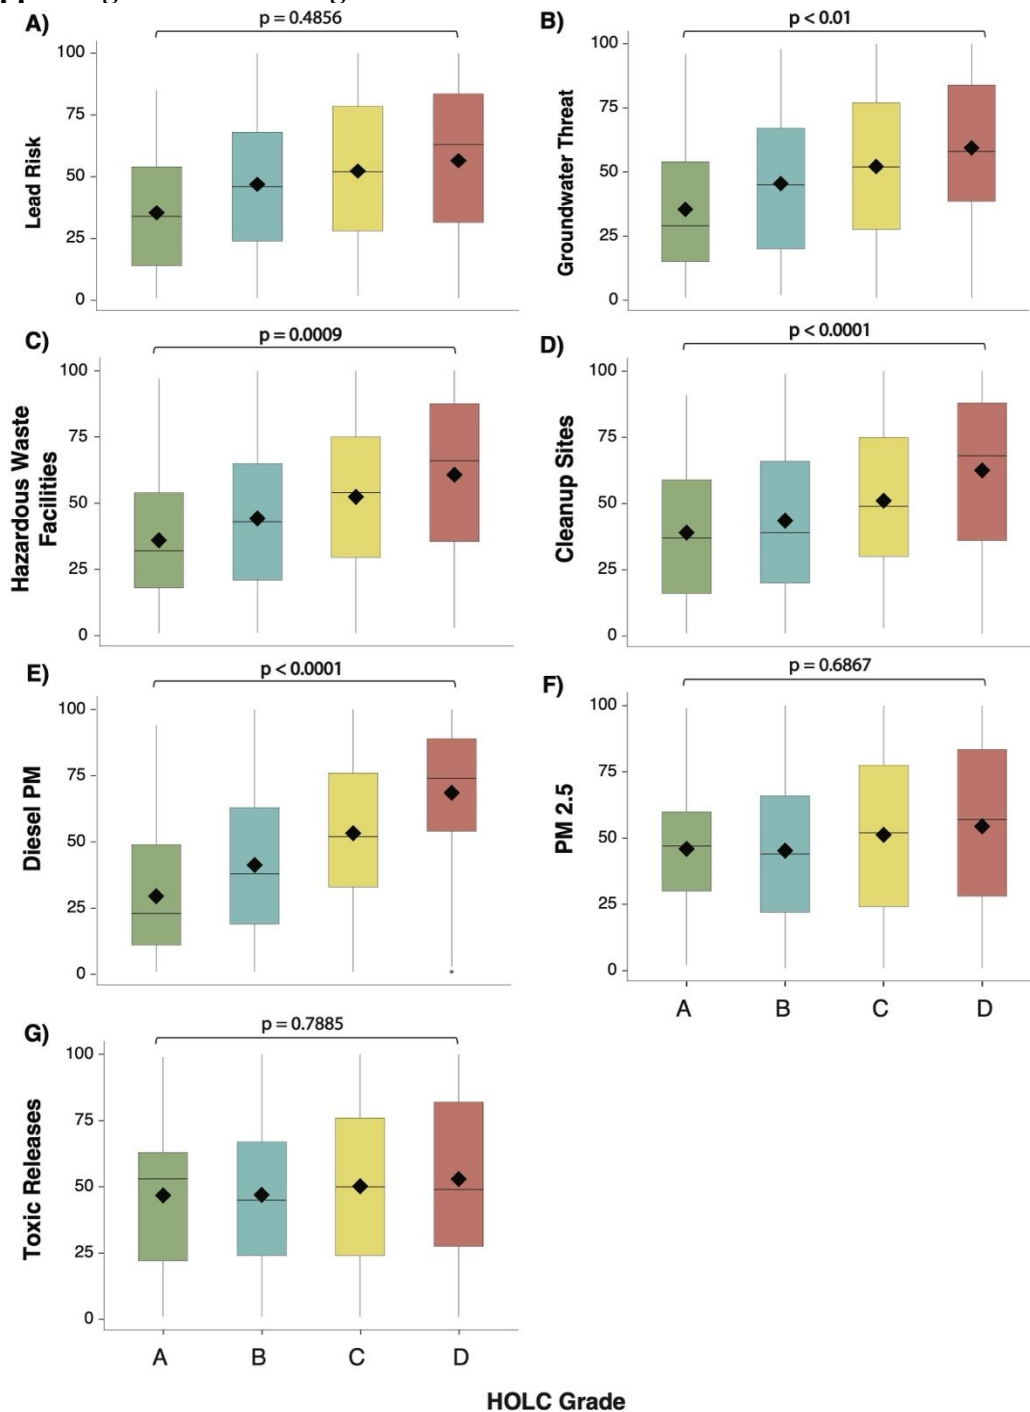

173  
 174 **Figure S1.** The relationship between HOLC grade and environmental hazards. We show (A)  
 175 lead risk from housing, (B) water contamination, (C) hazardous waste facilities, (D) cleanup  
 176 sites, (E) diesel particulate matter, (F) particulate matter (pm) 2.5 and (G) toxic releases from  
 177 facilities across formerly graded HOLC neighborhoods. Measurements are shown in box plots  
 178 where each dot represents a measurement within a neighborhood. The mean is shown as a black  
 179 diamond, and whiskers represent 95% confidence intervals.

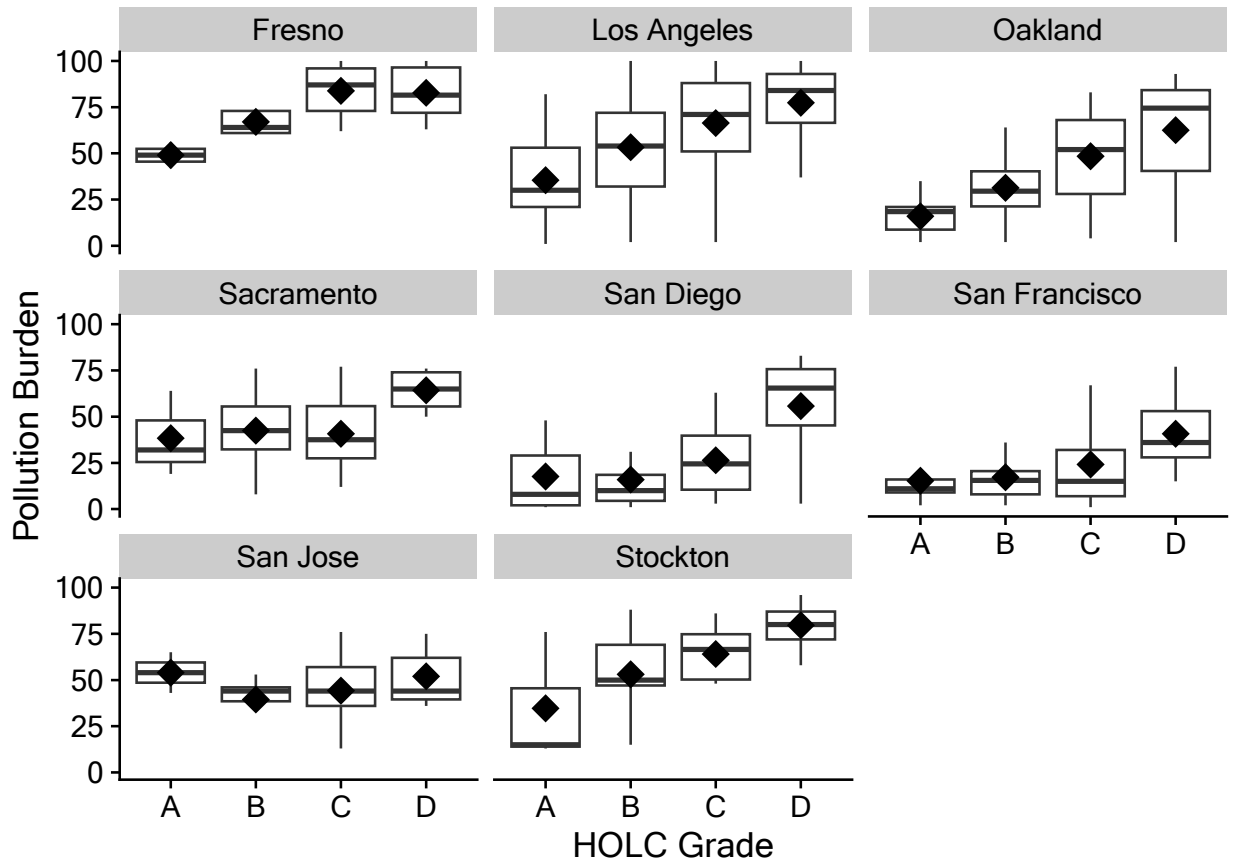

180  
 181  
 182  
 183  
 184

**Figure S2.** The relationship between HOLC grade and overall pollution burden for each city in our dataset. Measurements are shown in box plots where each dot represents a measurement within a neighborhood. The mean is shown as a black diamond, and whiskers represent 95% confidence intervals.

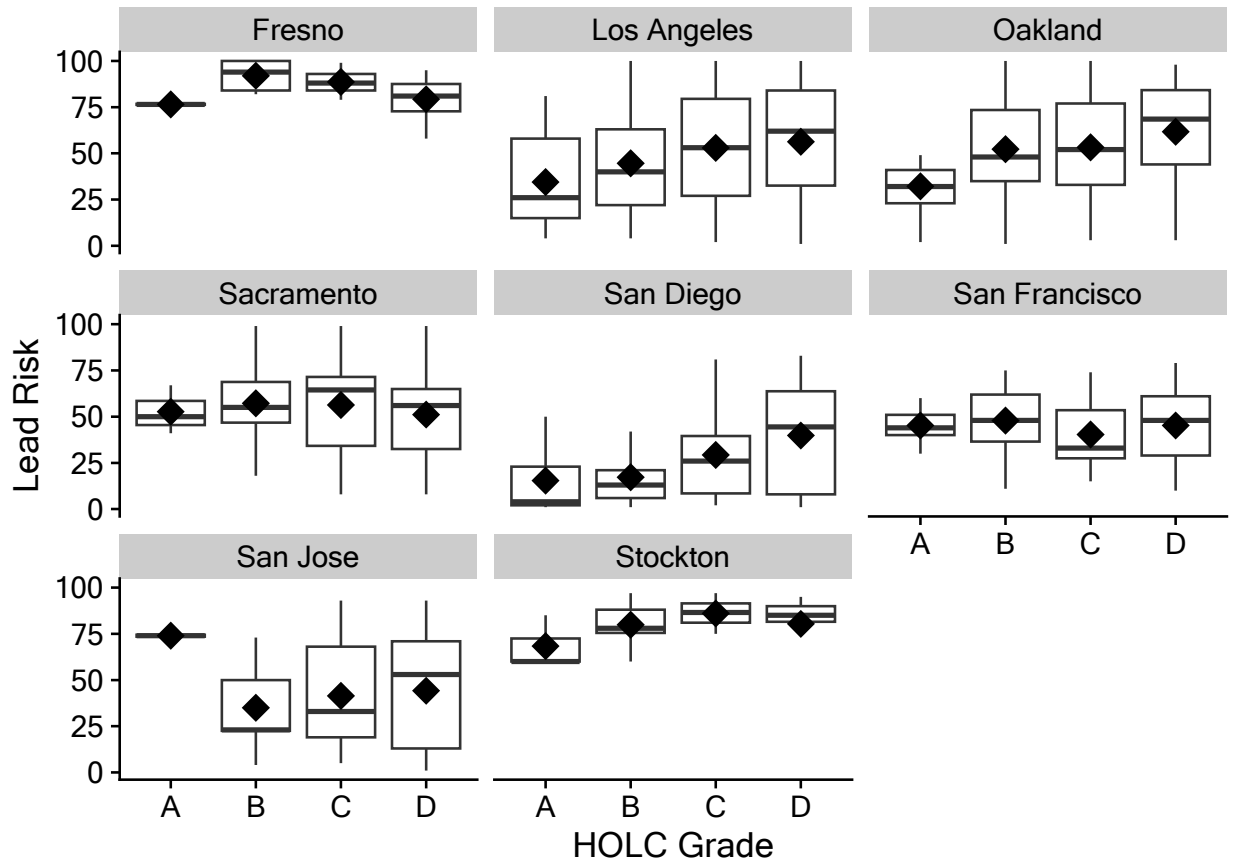

185  
 186  
 187  
 188  
 189

**Figure S3.** The relationship between HOLC grade and lead risk from housing for each city in our dataset. Measurements are shown in box plots where each dot represents a measurement within a neighborhood. The mean is shown as a black diamond, and whiskers represent 95% confidence intervals.



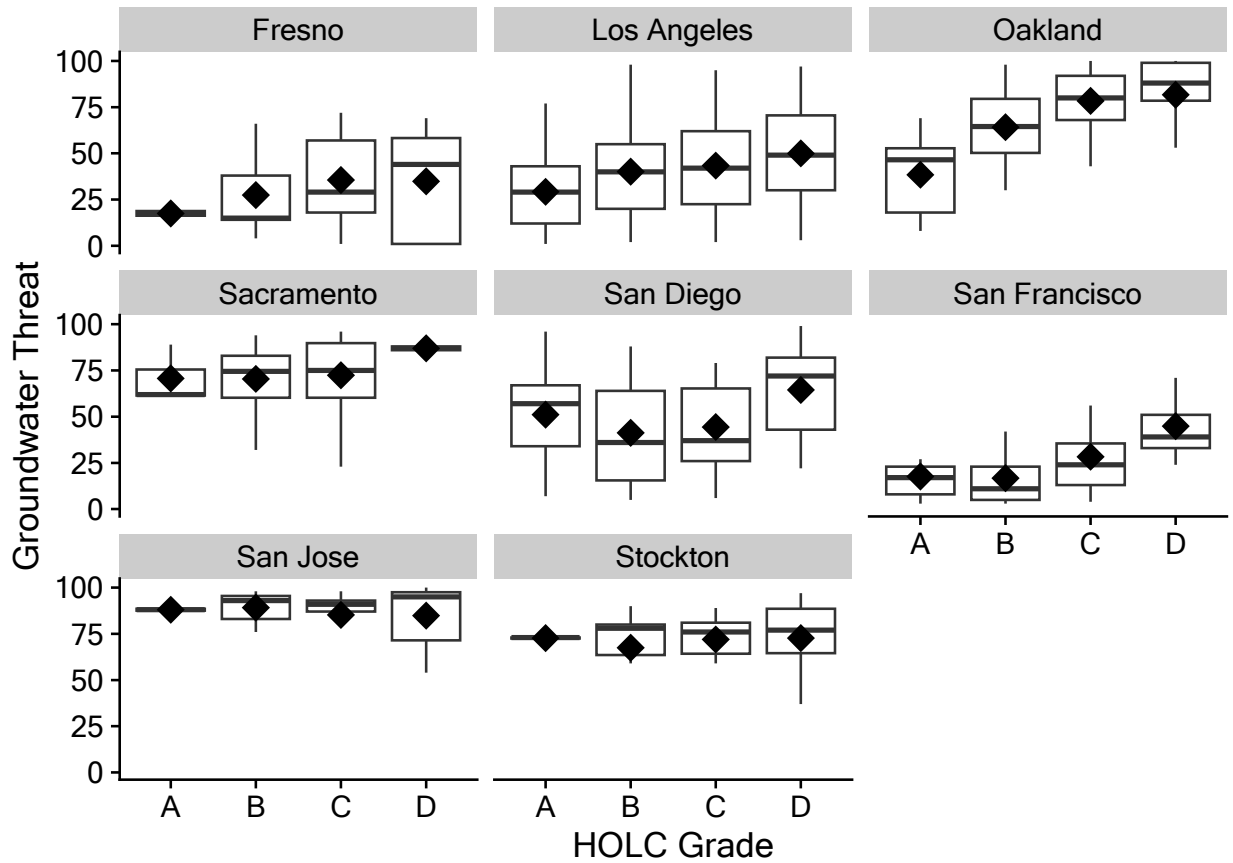

190  
 191 **Figure S4.** The relationship between HOLC grade and groundwater threat for each city in our  
 192 dataset. Measurements are shown in box plots where each dot represents a measurement within a  
 193 neighborhood. The mean is shown as a black diamond, and whiskers represent 95% confidence  
 194 intervals.

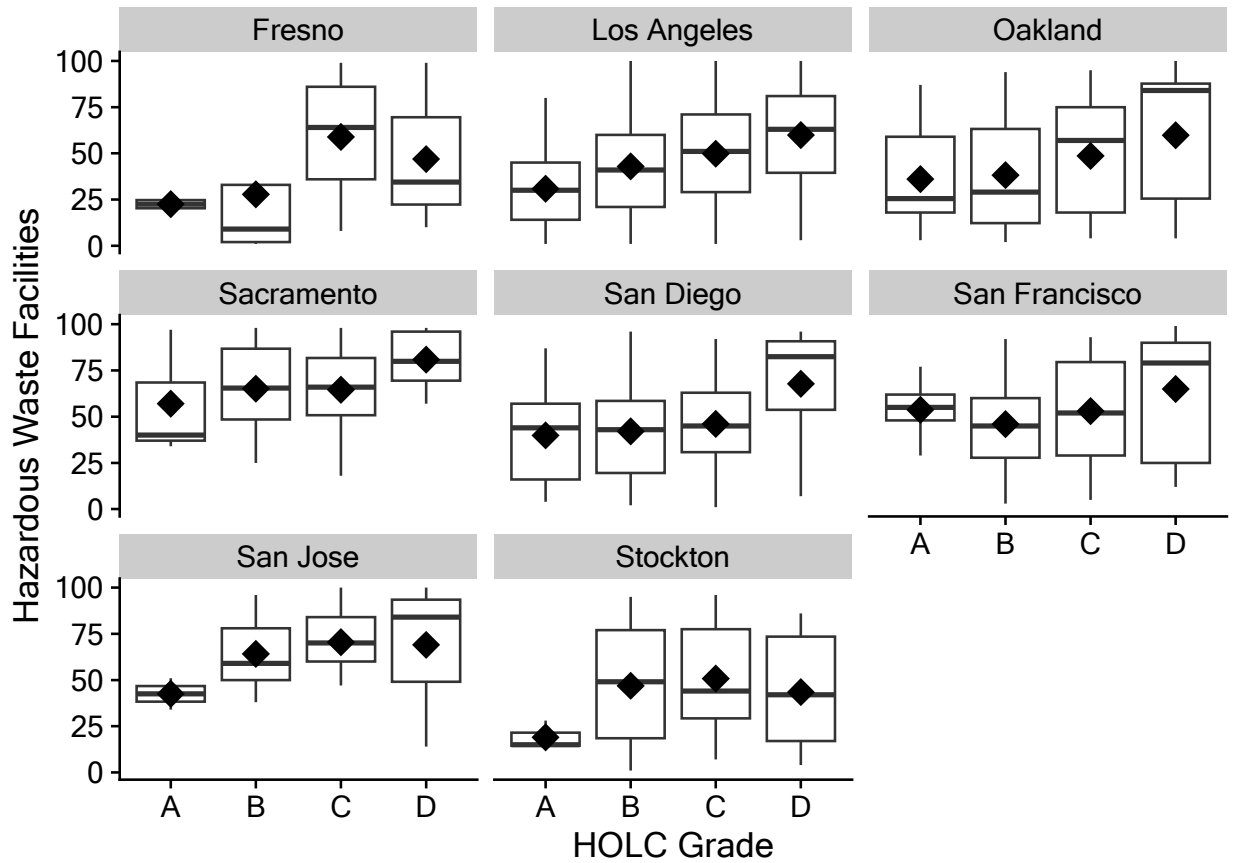

195  
 196 **Figure S5.** The relationship between HOLC grade and hazardous waste facilities for each city in  
 197 our dataset. Measurements are shown in box plots where each dot represents a measurement  
 198 within a neighborhood. The mean is shown as a black diamond, and whiskers represent 95%  
 199 confidence intervals.

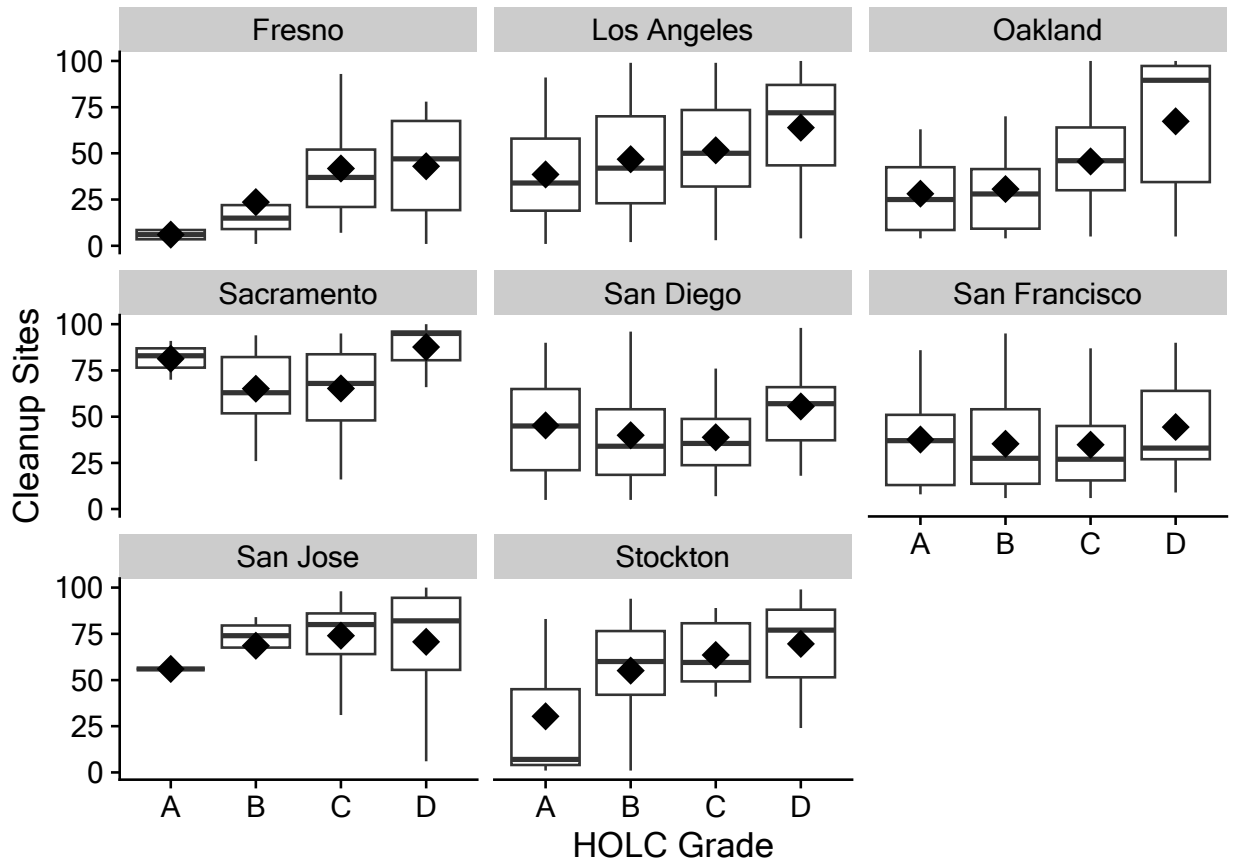

200  
 201  
 202  
 203  
 204

**Figure S6.** The relationship between HOLC grade and cleanup (i.e., brownfield) sites for each city in our dataset. Measurements are shown in box plots where each dot represents a measurement within a neighborhood. The mean is shown as a black diamond, and whiskers represent 95% confidence intervals.

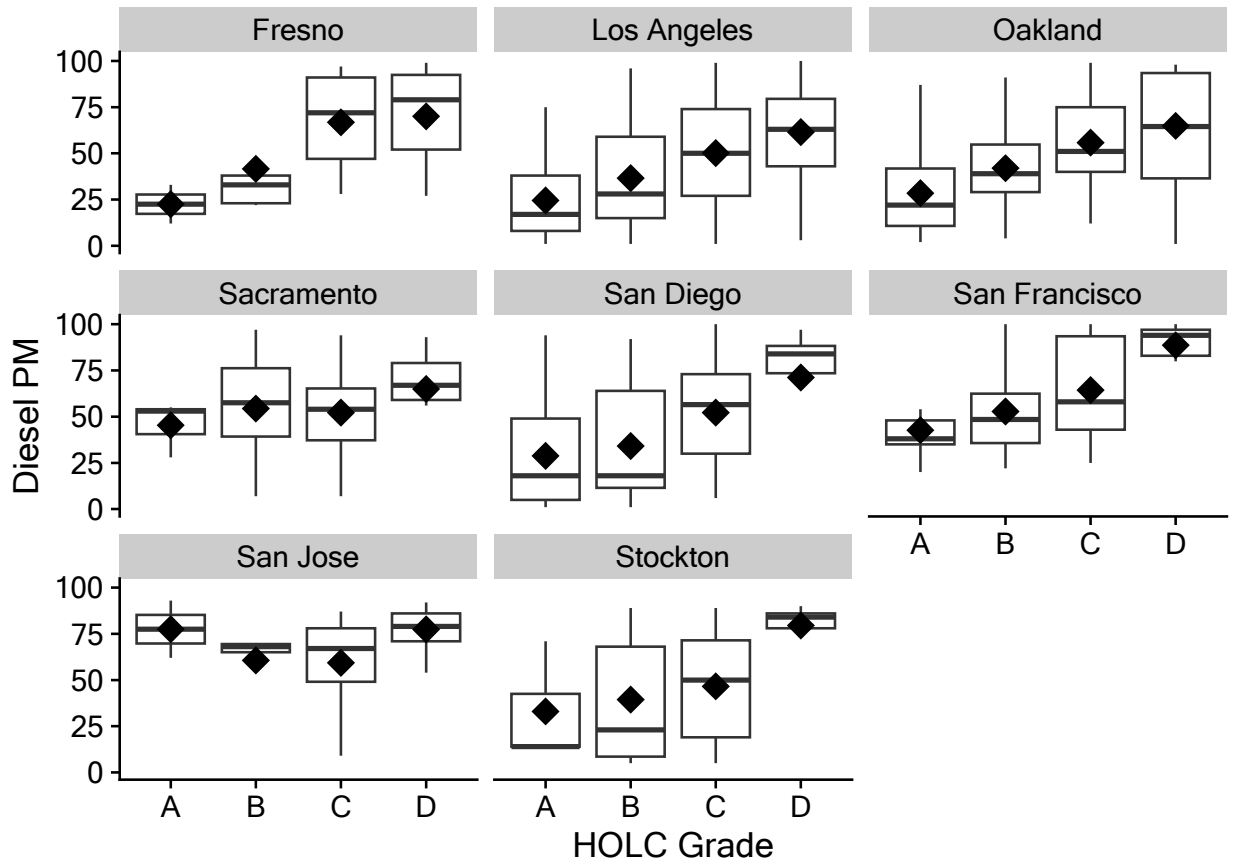

205  
 206  
 207  
 208  
 209

**Figure S7.** The relationship between HOLC grade and diesel particulate matter for each city in our dataset. Measurements are shown in box plots where each dot represents a measurement within a neighborhood. The mean is shown as a black diamond, and whiskers represent 95% confidence intervals.

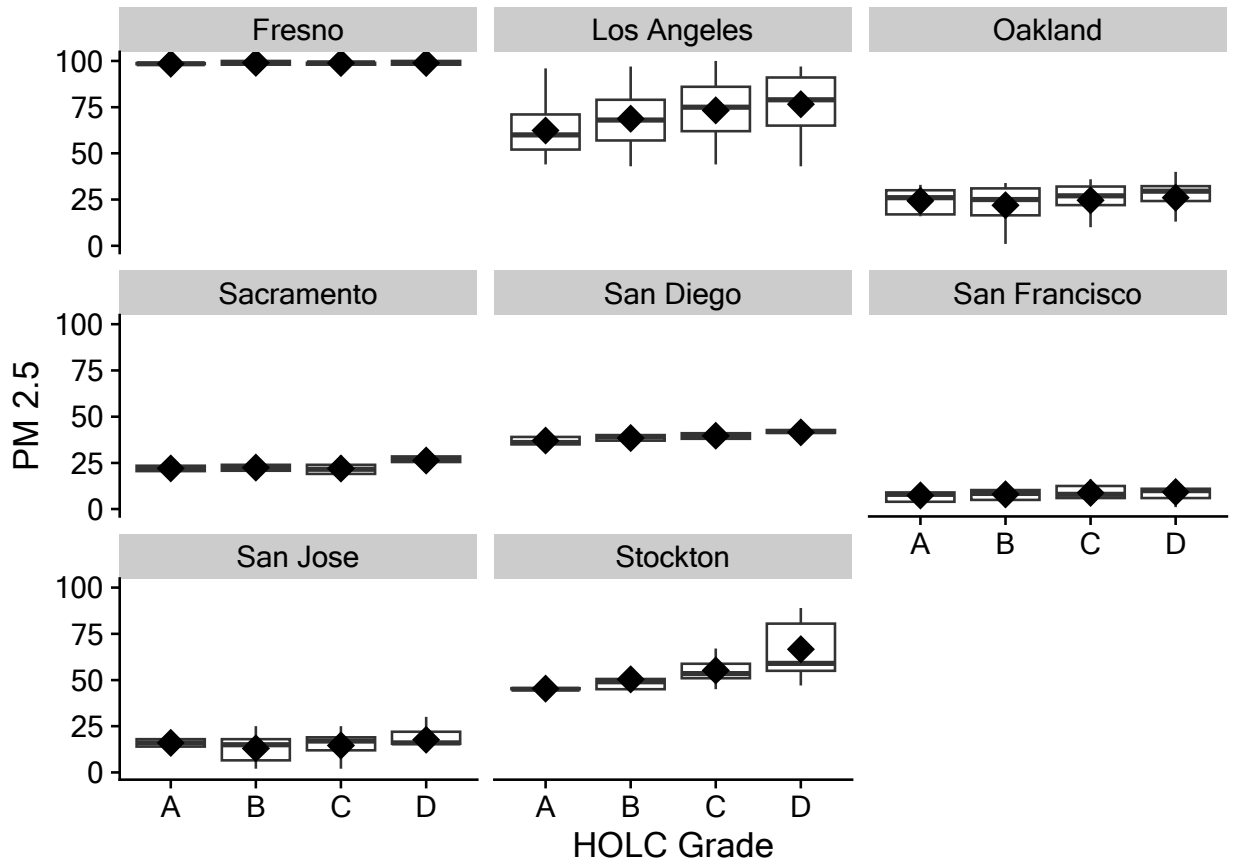

210  
 211  
 212  
 213  
 214

**Figure S8.** The relationship between HOLC grade and particulate matter 2.5 (PM<sub>2.5</sub>) for each city in our dataset. Measurements are shown in box plots where each dot represents a measurement within a neighborhood. The mean is shown as a black diamond, and whiskers represent 95% confidence intervals.

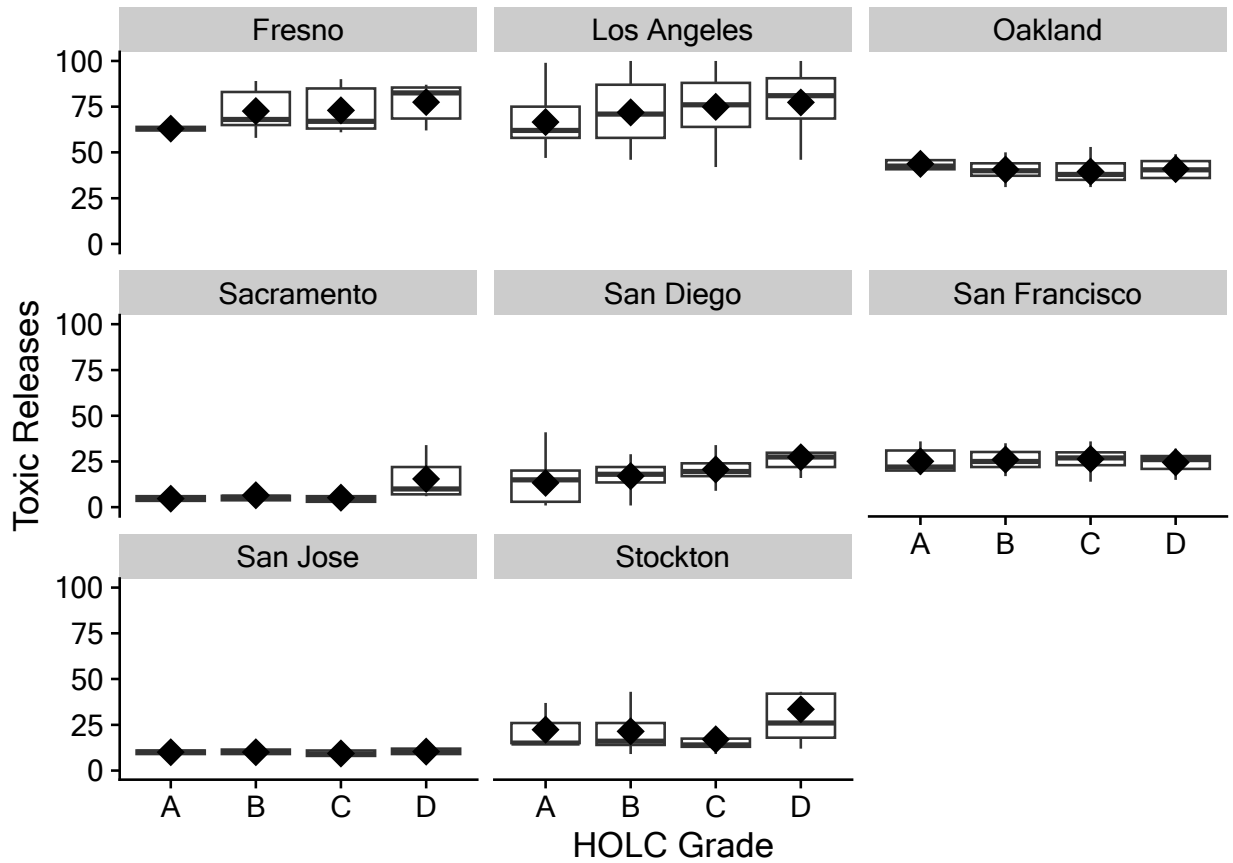

215  
 216 **Figure S9.** The relationship between HOLC grade and toxic releases from facilities for each city  
 217 in our dataset. Measurements are shown in box plots where each dot represents a measurement  
 218 within a neighborhood. The mean is shown as a black diamond, and whiskers represent 95%  
 219 confidence intervals.

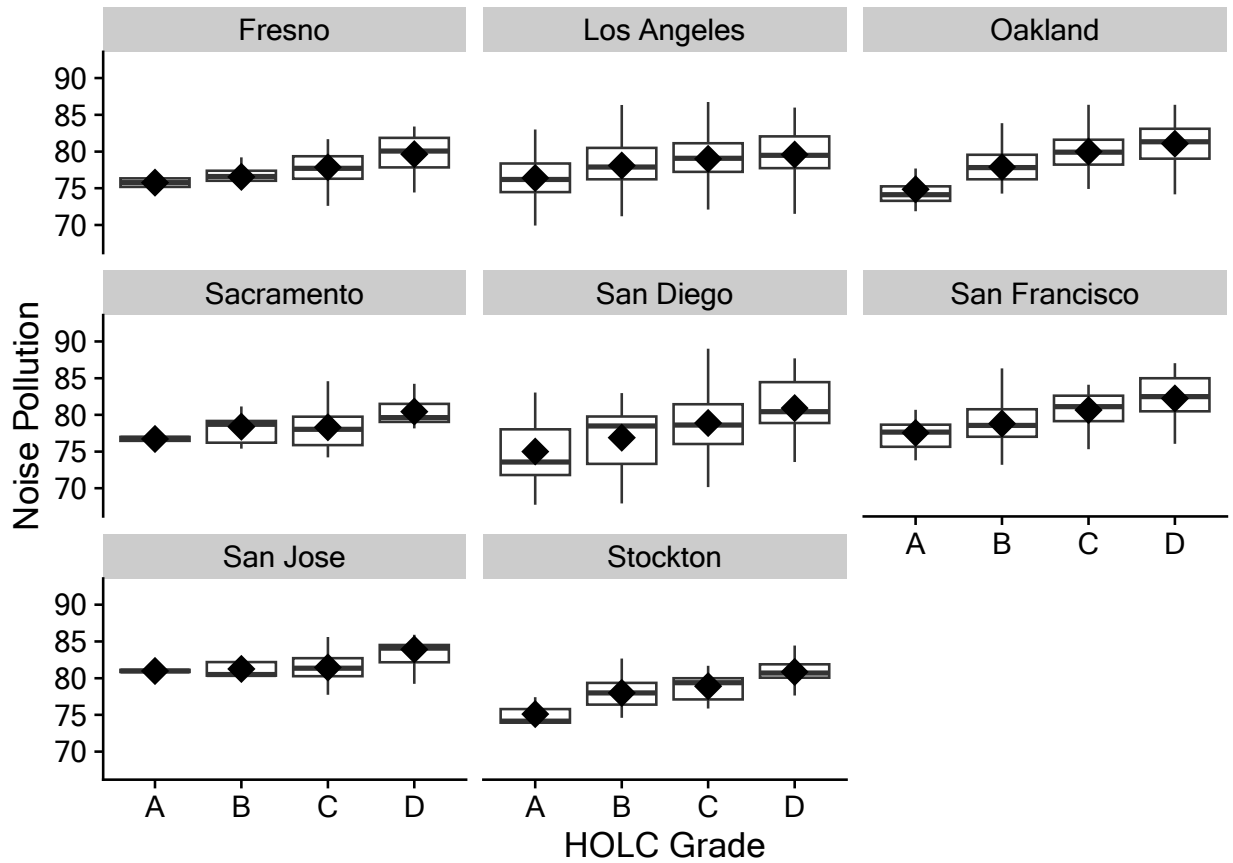

220  
 221 **Figure S10.** The relationship between HOLC grade and noise pollution for each city in our  
 222 dataset. Measurements are shown in box plots where each dot represents a measurement within a  
 223 neighborhood. The mean is shown as a black diamond, and whiskers represent 95% confidence  
 224 intervals.

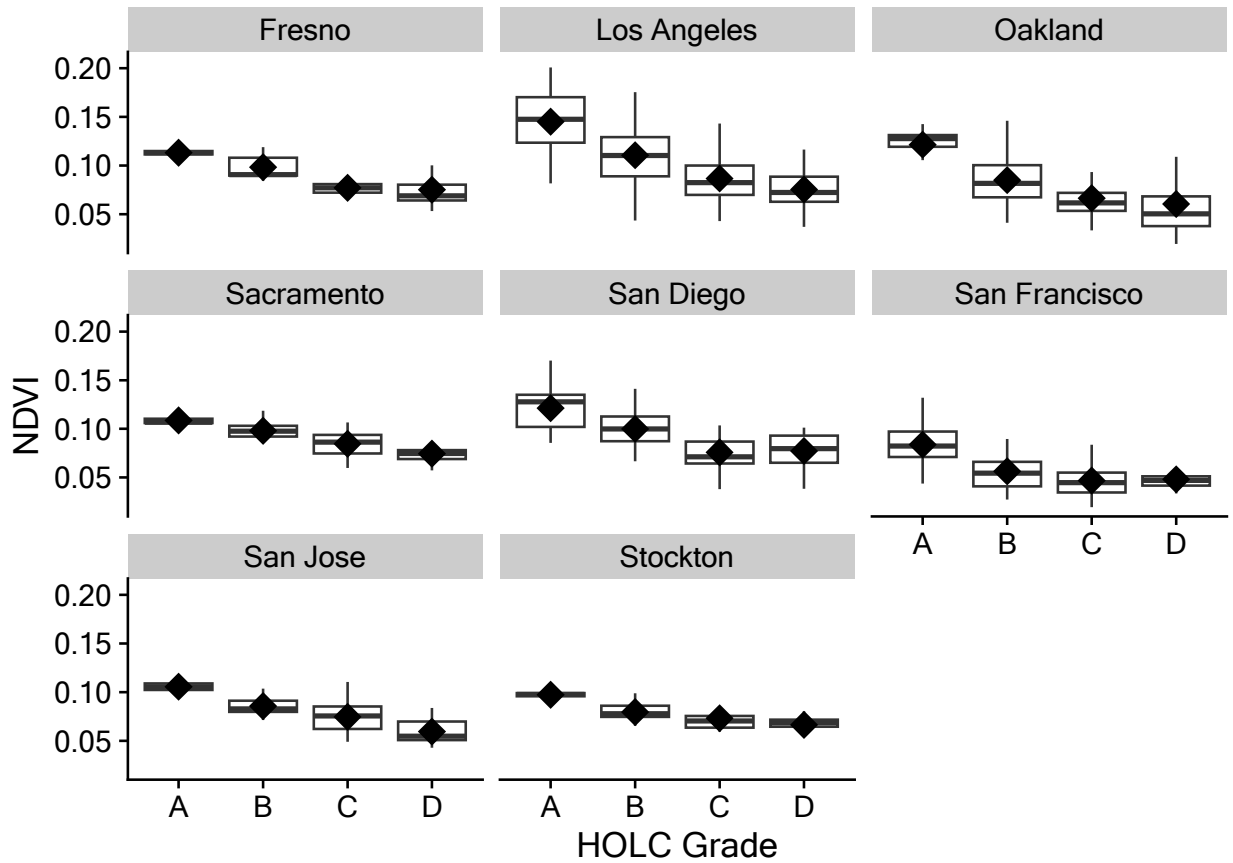

225  
 226  
 227  
 228  
 229

**Figure S11.** The relationship between HOLC grade and NDVI (i.e., vegetation) for each city in our dataset. Measurements are shown in box plots where each dot represents a measurement within a neighborhood. The mean is shown as a black diamond, and whiskers represent 95% confidence intervals.



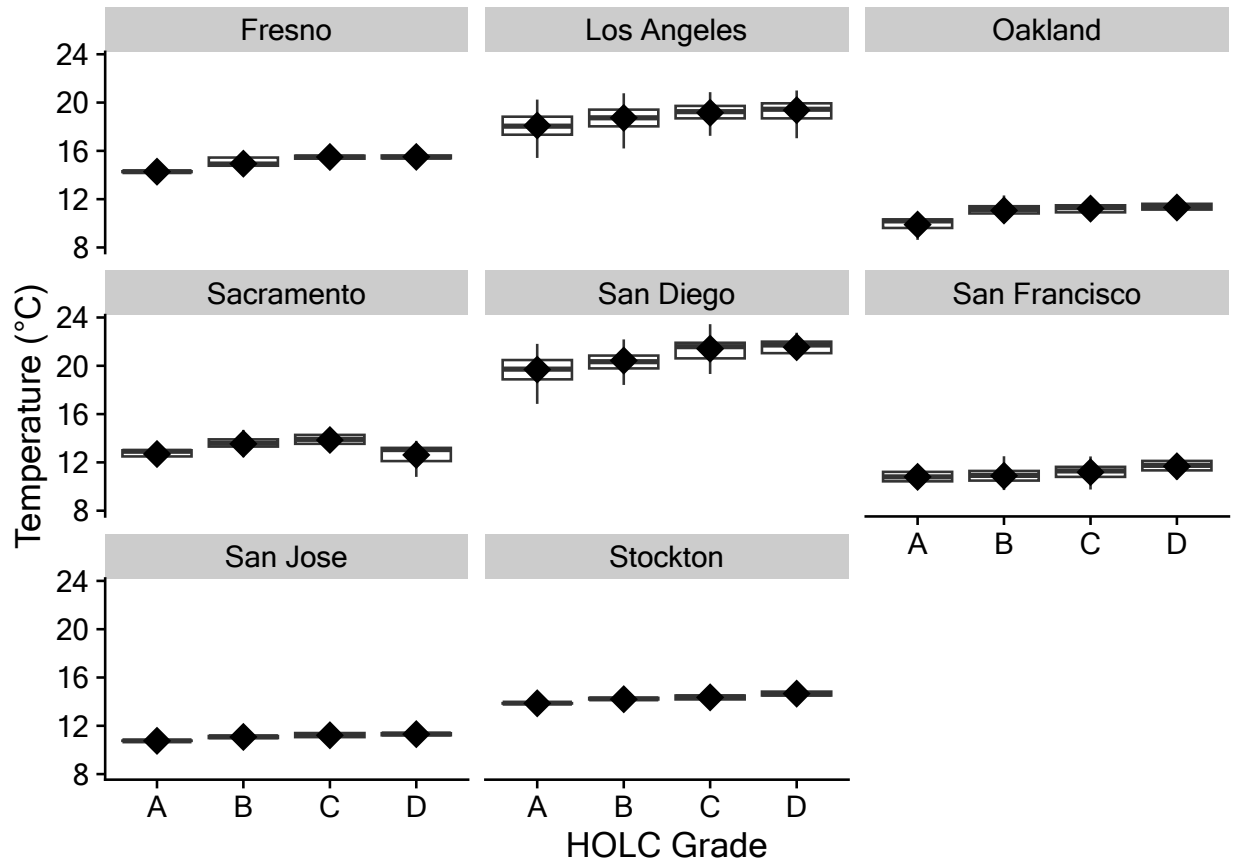

230  
 231 **Figure S12.** The relationship between HOLC grade and temperature for each city in our dataset.  
 232 Measurements are shown in box plots where each dot represents a measurement within a  
 233 neighborhood. The mean is shown as a black diamond, and whiskers represent 95% confidence  
 234 intervals.

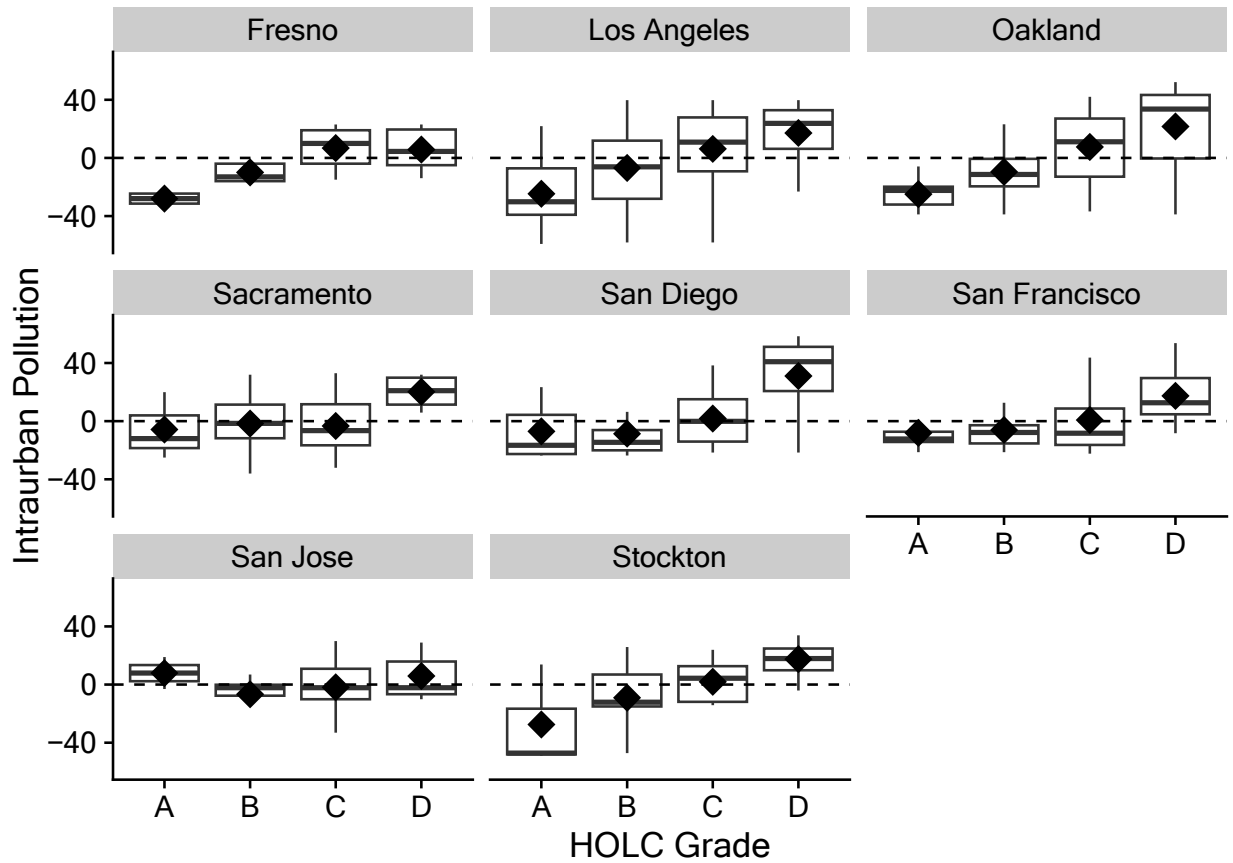

235

236

237

238

239

240

**Figure S13.** The relationship between HOLC grade and intraurban disparities in pollution burden for each city in our dataset. Measurements are shown in box plots where each dot represents a measurement within a neighborhood. The mean is shown as a black diamond, and whiskers represent 95% confidence intervals. Values above the line represent a higher pollution burden than the city's average.

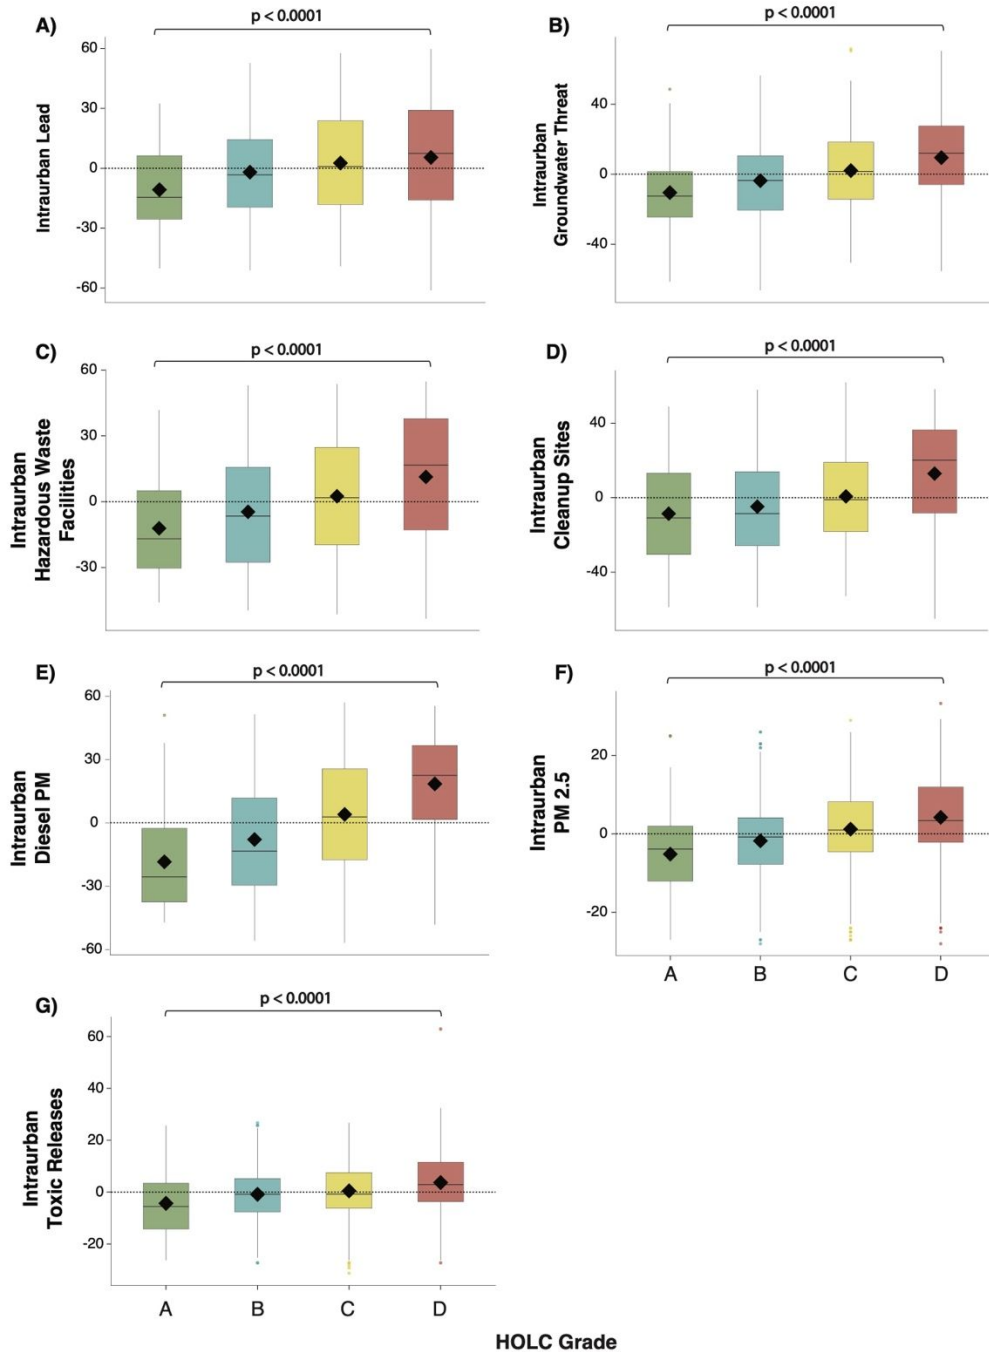

241  
 242 **Figure S14.** The relationship between HOLC grade and intraurban disparities for (A) lead risk  
 243 from housing, (B) water contamination, (C) hazardous waste facilities, (D) cleanup sites, (E)  
 244 diesel particulate matter, (F) particulate matter (pm) 2.5 and (G) toxic releases from facilities  
 245 across formerly graded HOLC neighborhoods. The mean is shown as a black diamond, and  
 246 whiskers represent 95% confidence intervals. Values above the line represent higher  
 247 environmental hazard exposure than the city's average.

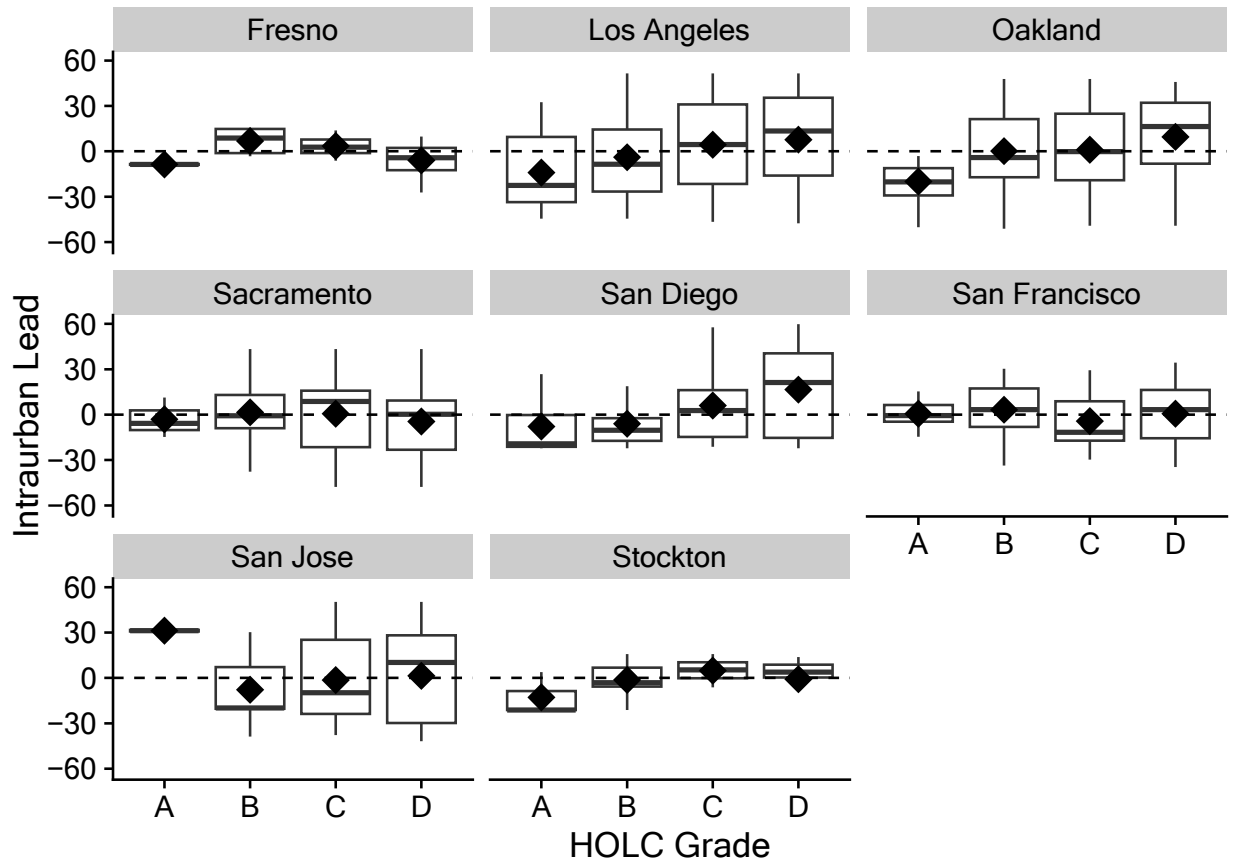

248  
 249  
 250  
 251  
 252  
 253

**Figure S15.** The relationship between HOLC grade and intraurban disparities in lead risk from housing for each city in our dataset. Measurements are shown in box plots where each dot represents a measurement within a neighborhood. The mean is shown as a black diamond, and whiskers represent 95% confidence intervals. Values above the line represent higher lead risk than the city's average.

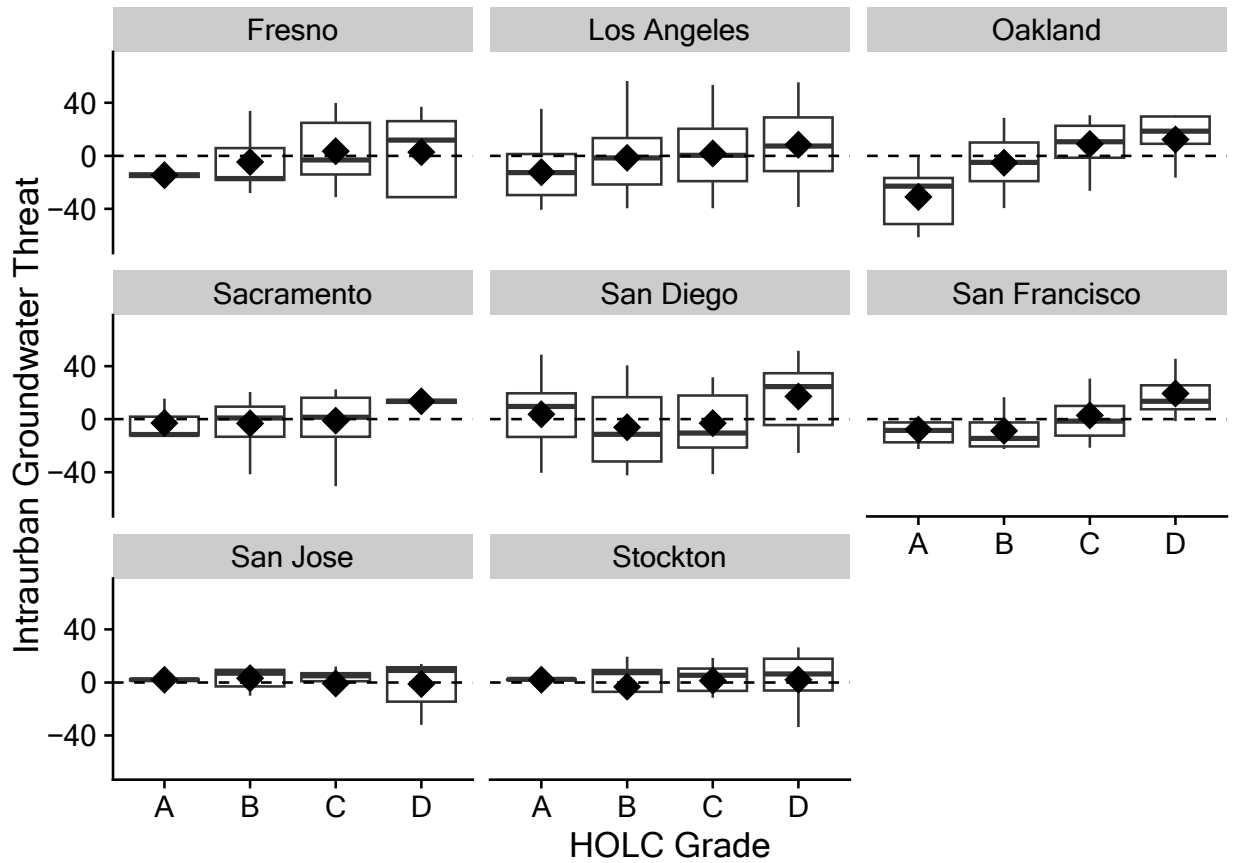

254  
 255  
 256  
 257  
 258  
 259

**Figure S16.** The relationship between HOLC grade and intraurban disparities in groundwater threat for each city in our dataset. Measurements are shown in box plots where each dot represents a measurement within a neighborhood. The mean is shown as a black diamond, and whiskers represent 95% confidence intervals. Values above the line represent higher levels of groundwater threat than the city's average.

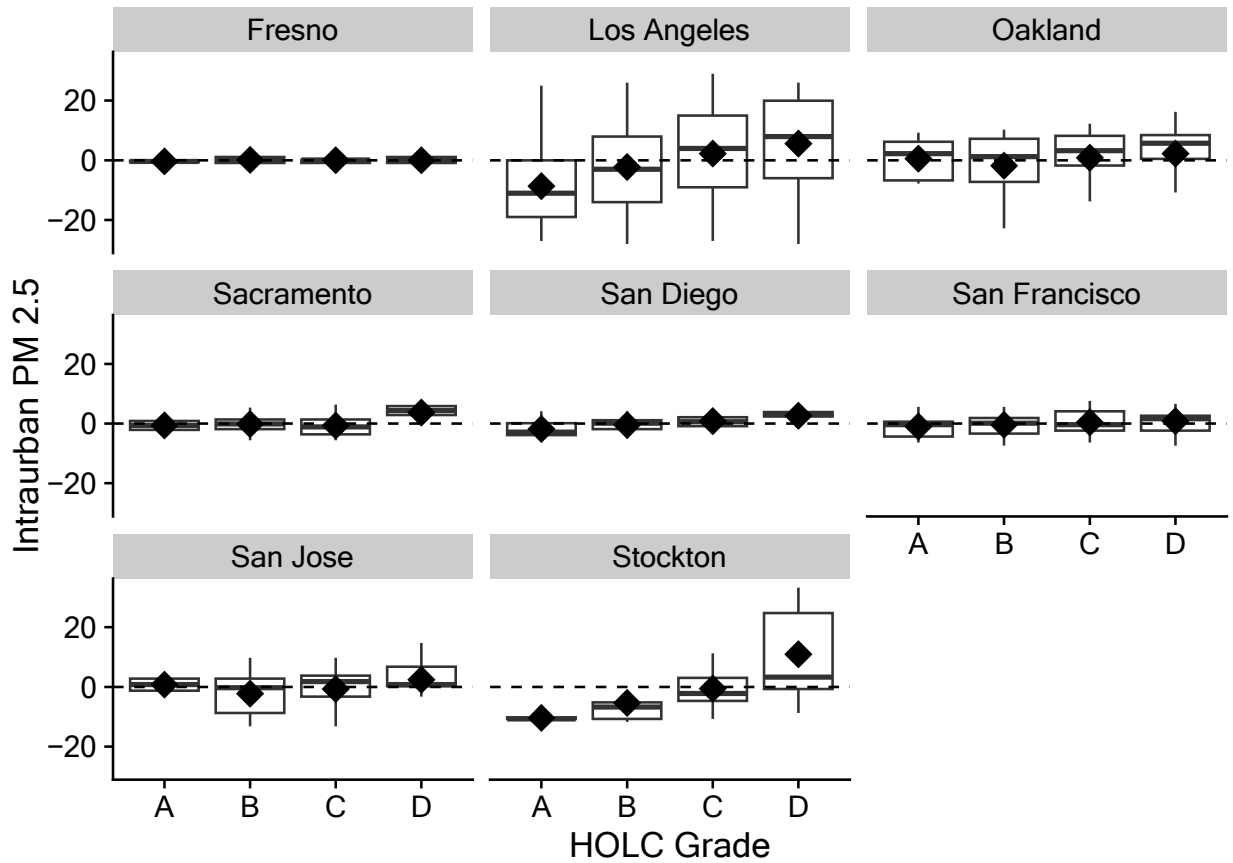

260  
 261 **Figure S17.** The relationship between HOLC grade and intraurban disparities in particulate  
 262 matter 2.5 ( $PM_{2.5}$ ) for each city in our dataset. Measurements are shown in box plots where each  
 263 dot represents a measurement within a neighborhood. The mean is shown as a black diamond,  
 264 and whiskers represent 95% confidence intervals. Values above the line represent higher levels  
 265 of  $PM_{2.5}$  than the city's average.

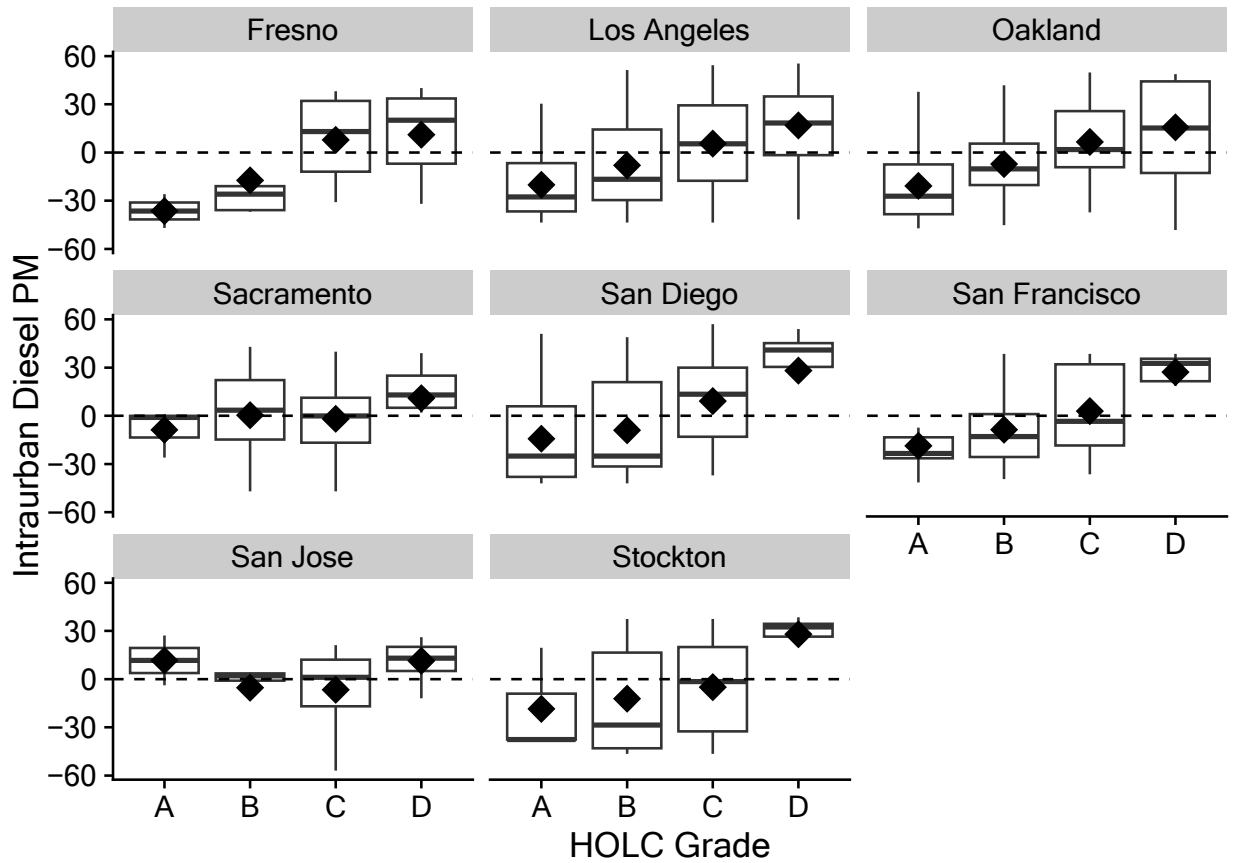

266  
267  
268  
269  
270  
271

**Figure S18.** The relationship between HOLC grade and intraurban disparities in diesel particulate matter for each city in our dataset. Measurements are shown in box plots where each dot represents a measurement within a neighborhood. The mean is shown as a black diamond, and whiskers represent 95% confidence intervals. Values above the line represent higher levels of diesel particulate matter than the city's average.

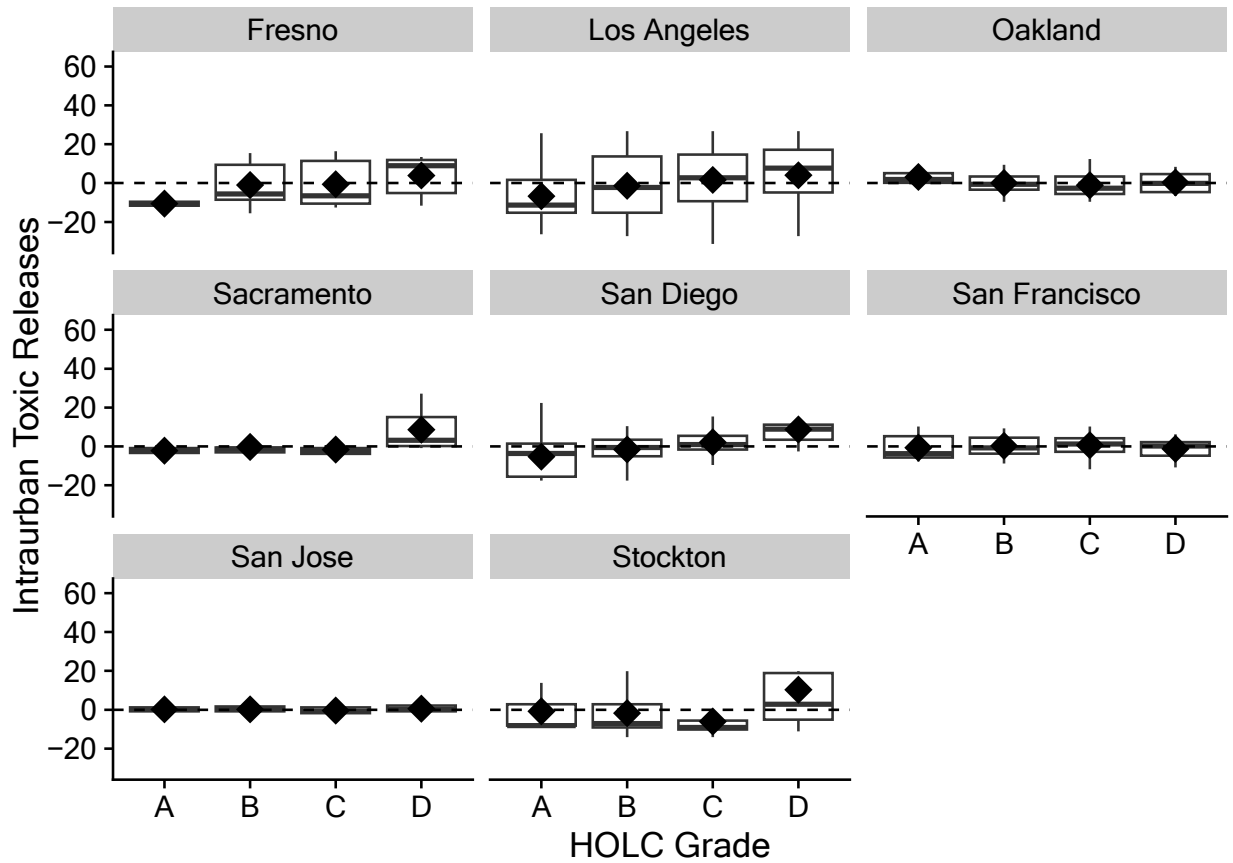

272  
 273 **Figure S19.** The relationship between HOLC grade and intraurban disparities in toxic releases  
 274 from facilities for each city in our dataset. Measurements are shown in box plots where each dot  
 275 represents a measurement within a neighborhood. The mean is shown as a black diamond, and  
 276 whiskers represent 95% confidence intervals. Values above the line represent higher levels of  
 277 toxic releases than the city's average.



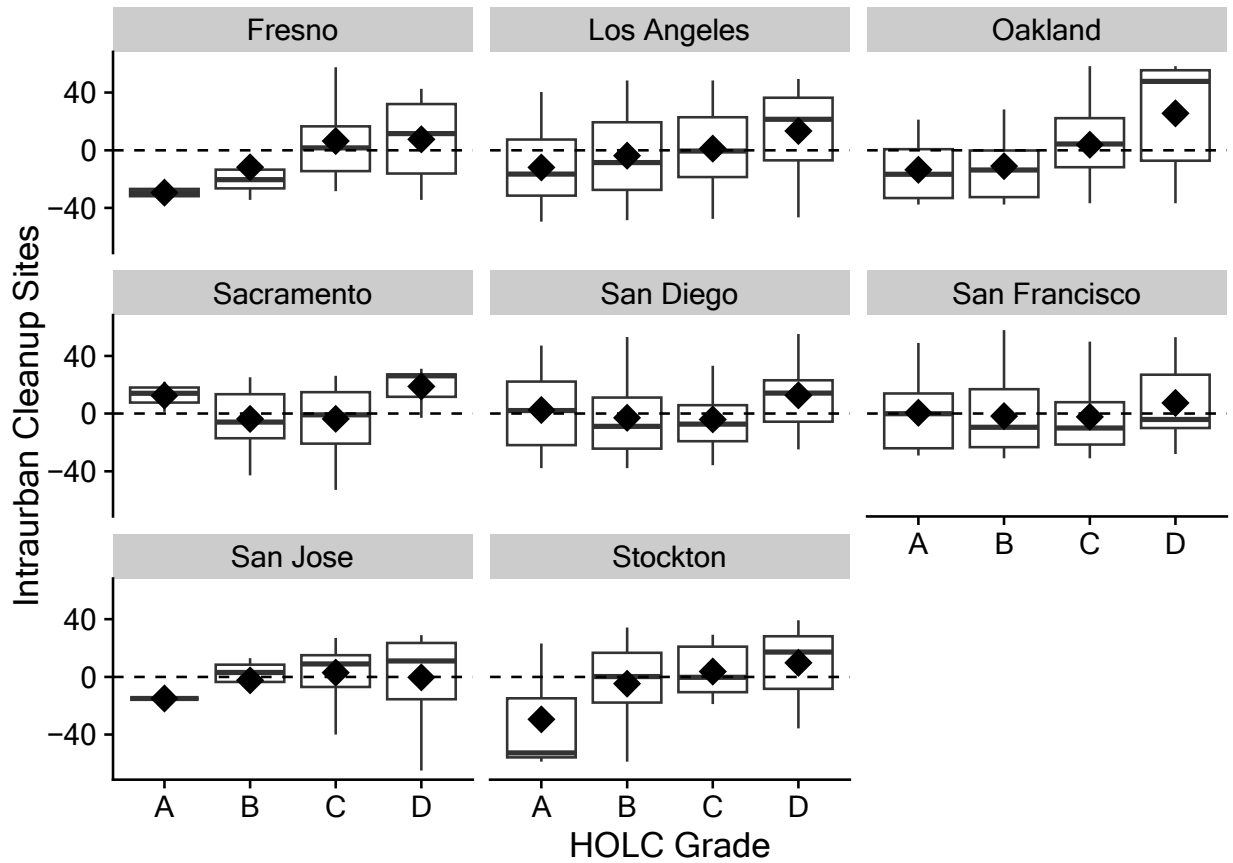

278

279

280

281

282

283

**Figure S20.** The relationship between HOLC grade and intraurban disparities in cleanup (i.e., brownfield) sites for each city in our dataset. Measurements are shown in box plots where each dot represents a measurement within a neighborhood. The mean is shown as a black diamond, and whiskers represent 95% confidence intervals. Values above the line represent higher amounts of cleanup sites than the city's average.

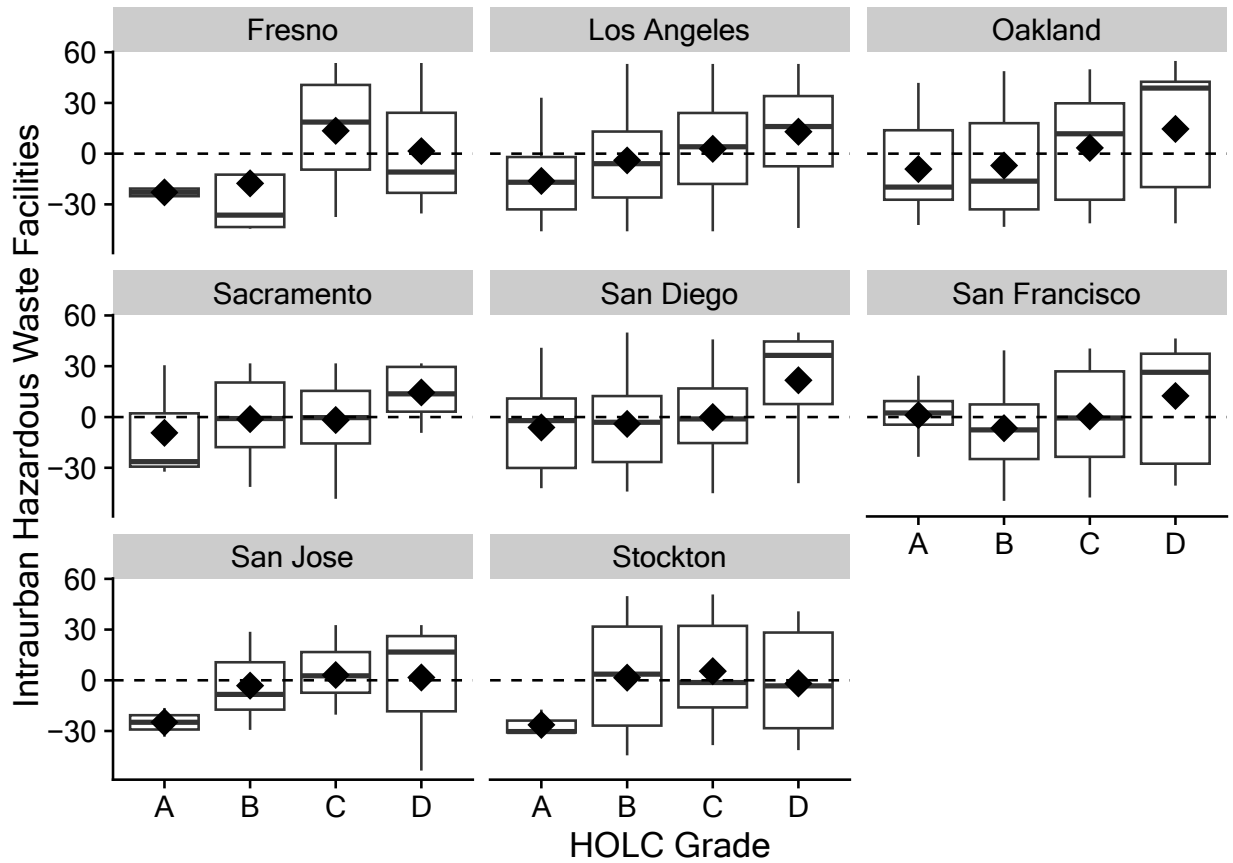

284  
 285 **Figure S21.** The relationship between HOLC grade and intraurban disparities in hazardous waste  
 286 facilities for each city in our dataset. Measurements are shown in box plots where each dot  
 287 represents a measurement within a neighborhood. The mean is shown as a black diamond, and  
 288 whiskers represent 95% confidence intervals. Values above the line represent higher amounts of  
 289 hazardous waste facilities than the city's average.

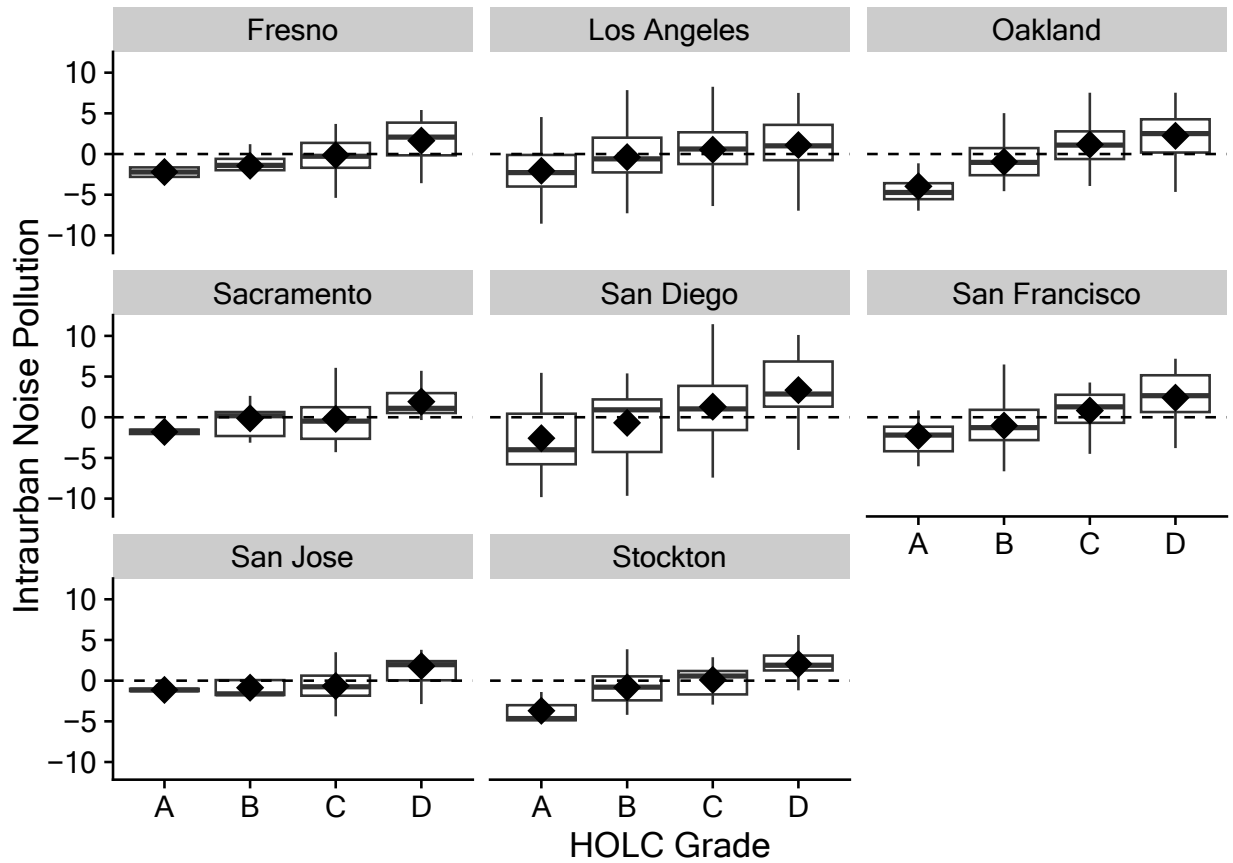

290

291 **Figure S22.** The relationship between HOLC grade and intraurban disparities in noise pollution  
 292 for each city in our dataset. Measurements are shown in box plots where each dot represents a  
 293 measurement within a neighborhood. The mean is shown as a black diamond, and whiskers  
 294 represent 95% confidence intervals. Values above the line represent higher levels of noise  
 295 pollution than the city's average.

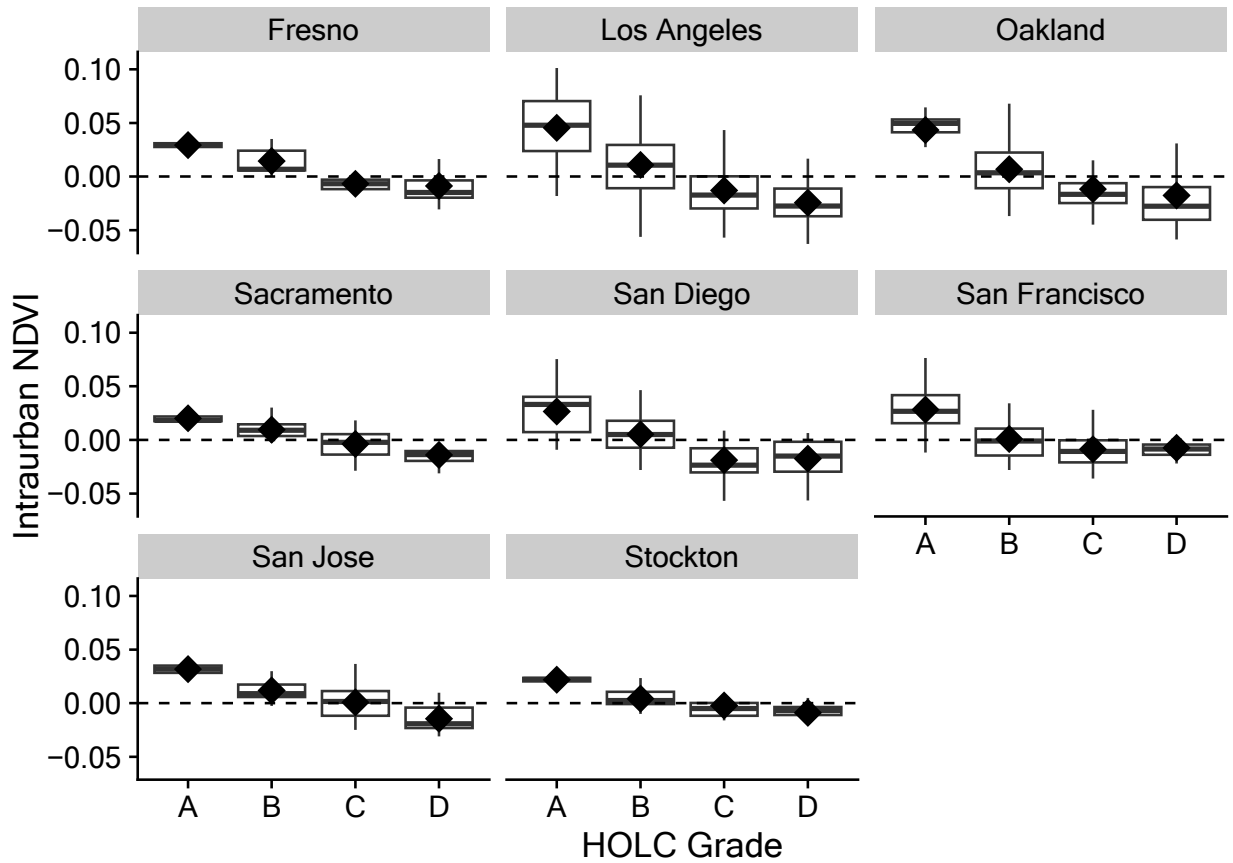

296

297

298

299

300

301

**Figure S23.** The relationship between HOLC grade and intraurban disparities in NDVI (i.e., vegetation) for each city in our dataset. Measurements are shown in box plots where each dot represents a measurement within a neighborhood. The mean is shown as a black diamond, and whiskers represent 95% confidence intervals. Values below the line represent less vegetation than the city's average.

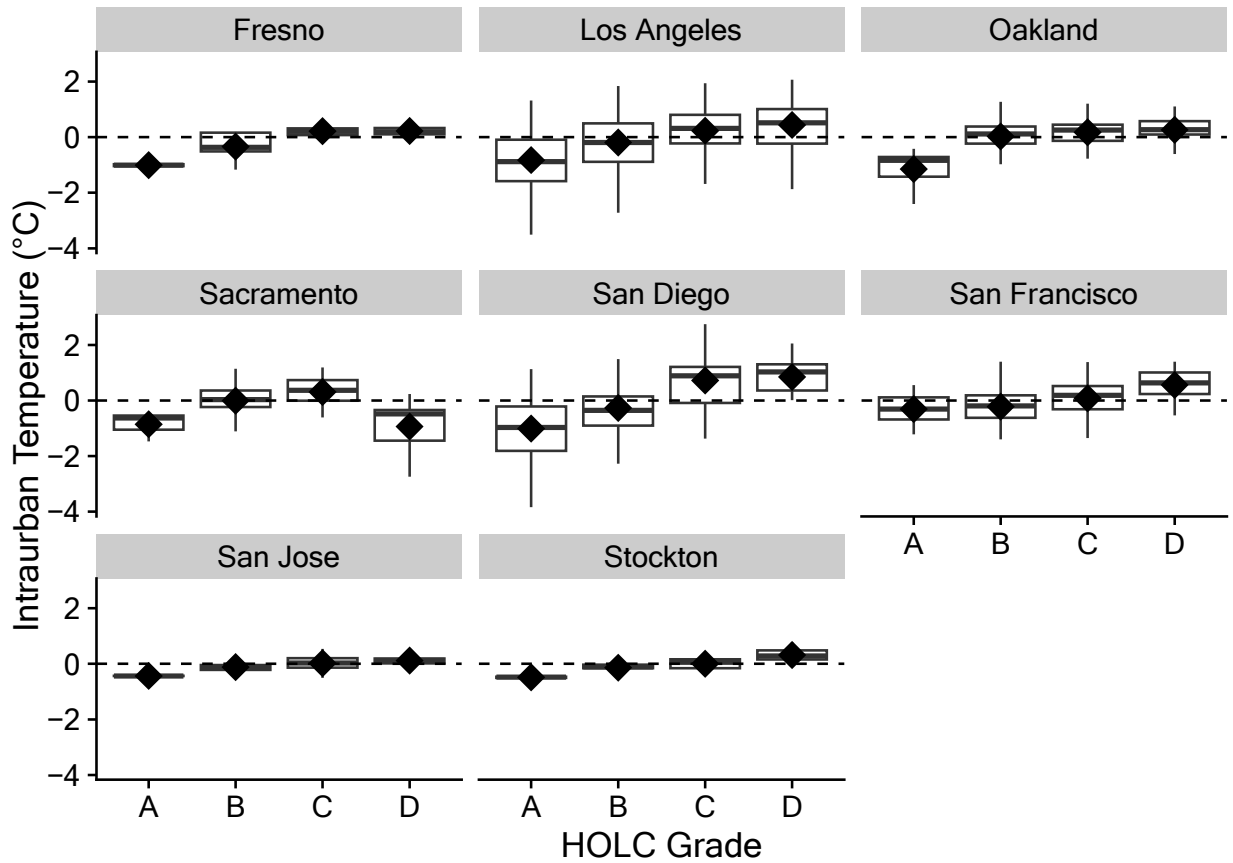

302  
 303  
 304  
 305  
 306  
 307

**Figure S24.** The relationship between HOLC grade and intraurban disparities in temperature for each city in our dataset. Measurements are shown in box plots where each dot represents a measurement within a neighborhood. The mean is shown as a black diamond, and whiskers represent 95% confidence intervals. Values above the line represent higher temperature than the city's average.
